1 **Quantitative and population genomics suggest a broad role of staygreen loci in the drought**  
2 **adaptation of sorghum**

3

4

5 Jacques M. Faye<sup>1,2</sup>, Eyanawa A. Akata<sup>2,3</sup>, Bassirou Sine<sup>2</sup>, Cyril Diatta<sup>2</sup>, Ndiaga Cisse<sup>2</sup>, Daniel

6 Fonceka<sup>2,4</sup>, Geoffrey P. Morris<sup>1,5</sup>

7

8 <sup>1</sup> Department of Agronomy, Kansas State University, Manhattan, KS, USA.

9 <sup>2</sup> Centre d'Étude Régional pour l'Amélioration de l'Adaptation à la Sécheresse, Institut  
10 Sénégalais de Recherches Agricoles, Thiès, Sénégal.

11 <sup>3</sup> Institut Togolais de Recherche Agronomique, Togo.

12 <sup>4</sup> AGAP, Univ Montpellier, CIRAD, INRA, Montpellier SupAgro, Montpellier, France.

13 <sup>5</sup> Department of Soil & Crop Science, Colorado State University

14

15 Author for correspondence:

16 Geoffrey P. Morris

17 Email: [Geoff.Morris@colostate.edu](mailto:Geoff.Morris@colostate.edu)

18

19 **SUMMARY**

- 20 ● Drought is a major constraint on plant productivity globally. Sorghum (*Sorghum bicolor*)  
21 landraces have evolved in drought-prone regions, but the genetics of their adaptation is  
22 not yet understood. Loci underlying stay-green post-flowering drought tolerance (*Stg*),  
23 have been identified in a temperate breeding line, but their role in drought adaptation of  
24 tropical sorghum is to be elucidated.
- 25 ● We phenotyped 590 diverse sorghum accessions from West Africa under field-based  
26 managed drought stress, pre-flowering (WS1) and post-flowering (WS2) over several  
27 years and conducted genome-wide association studies (GWAS).
- 28 ● Broad-sense heritability for grain and biomass yield components was high (33-92%)  
29 across environments. There was a significant correlation between stress tolerance index  
30 (STI) for grain weight across WS1 and WS2. GWAS revealed that *SbZf11* and *SbCN12*,  
31 orthologs of maize flowering genes, likely underlie flowering time variation under these  
32 conditions. GWAS further identified associations (n = 134) for STI and drought effects  
33 on yield components, including 16 putative pleiotropic associations. Thirty of the  
34 associations colocalized with *Stg1-4* loci and had large effects. Seven lead associations,  
35 including some within *Stg1*, overlapped with positive selection outliers.
- 36 ● Our findings reveal natural genetic variation for drought tolerance-related traits, and  
37 suggest a broad role of *Stg* loci in drought adaptation of sorghum.

38  
39  
40

## 41 INTRODUCTION

42 Unpredictable rainfall and drought are major limitations to plant productivity worldwide.  
43 Improving crop adaptation to water limitation is critical for establishing food security in  
44 developing countries where smallholder farmers are vulnerable to climate change (Mundia *et al.*,  
45 2019). From an agronomic perspective, drought adaptation is the ability to maintain yield under  
46 agronomic water limitation (Blum, 2010). An understanding of the genetic architecture of grain  
47 yield and its components across various drought scenarios can facilitate crop breeding to increase  
48 production. However, collecting good phenotypic data under well-managed water stress  
49 environments and integrating phenotypes with genotypes remain major constraints. The genetic  
50 dissection of yield components under various drought scenarios would provide favorable natural  
51 variants for drought tolerance.

52 Sorghum (*Sorghum bicolor*) is a staple cereal crop in drought-prone regions worldwide,  
53 including many developing countries of the semi-arid tropics as well as industrialized countries  
54 in the temperate latitudes. Sorghum is among the most drought-resilient crops, but the  
55 physiological and genetic basis of its drought tolerance is not yet understood (Mullet *et al.*,  
56 2014). Several quantitative trait loci (QTL) associated with drought tolerance variation in  
57 sorghum have been identified, but no genes have been cloned. The best studied of these QTL are  
58 stay-green loci (*Stg1–Stg4*) linked to post-flowering drought tolerance in biparental families and  
59 near-isogenic lines (Tuinstra *et al.*, 1997; Xu *et al.*, 2000; Harris *et al.*, 2007; Borrell *et al.*,  
60 2014b; Hayes *et al.*, 2016). The *Stg* loci influence several aspects of sorghum development,  
61 including canopy architecture, water use, and grain yield (Borrell *et al.*, 2014b). *Stg* alleles were  
62 identified in a temperate-adapted breeding line BTx642 (formerly B35) that is derived from a  
63 tropically-adapted Ethiopian durra landrace (IS12555). However, the prevalence of the *Stg*  
64 alleles in sub-Saharan Africa or their role in drought adaptation (if any) is not known.  
65 Understanding the genetic basis of drought adaptation in sorghum could elucidate the process of  
66 environmental adaptation and facilitate breeding of drought-tolerant varieties.

67 Local varieties have been under natural and farmers selection for adaptation to  
68 environmental conditions and farming systems. Local varieties of sorghum have adapted to  
69 various environmental conditions since their domestication (Harlan & De Wet, 1972; Wendorf *et al.*, 1992).  
70 Consequently, positive pleiotropic loci for combined pre- and post-flowering drought  
71 tolerance might exist in locally-adapted varieties. West African sorghum is extremely diverse

72 and there have been few cycles of selection in breeding programs (Mauboussin *et al.*, 1977;  
73 Leiser *et al.*, 2014). The West African sorghum association panel (WASAP), including landraces  
74 and breeding lines that consist of working collections of breeding programs, was assembled and  
75 genotyped using genotyping-by-sequencing technology. However, the genetic architecture  
76 underlying grain yield and its components under various drought scenarios remains largely  
77 unknown in the germplasm. We hypothesized that positively pleiotropic QTLs confer combined  
78 pre- and post-flowering drought tolerance in the West African sorghum.

79         Genome-wide association studies (GWAS) contribute to the identification of natural  
80 variants, taking advantage of historical recombinations within diversity panels (Yu & Buckler,  
81 2006; McCouch *et al.*, 2016; Yano *et al.*, 2016; Zhao *et al.*, 2019). A grass species such as  
82 sorghum is suitable to identify natural variants underlying complex agronomic traits partly due to  
83 its small genome size and moderate LD (Paterson *et al.*, 2009; Mace *et al.*, 2013; McCormick *et*  
84 *al.*, 2018). Disentangling positive pleiotropic effects of drought-yield QTLs through GWAS can  
85 contribute to detect and characterize the natural allelic variation existing within locally-adapted  
86 populations. In this study, we performed GWAS on 756 sorghum accessions of the WASAP  
87 under ten different environments using the previous GBS SNP dataset. We (i) characterize the  
88 genetic variation of yield components under various water stress environments; (ii) identify  
89 genetic variants at known and novel drought tolerance loci with high productivity under pre- and  
90 post-flowering water stress; (iii) investigate the pleiotropic effect of drought tolerance QTLs  
91 associated with STI and reduction of yield components under various drought scenarios; and (iv)  
92 determine signatures of selection overlapping with identified drought tolerance QTLs. The  
93 present study provides knowledge of the genetic architecture of yield components under various  
94 drought scenarios.

## 95 **MATERIALS AND METHODS**

### 96 **Plant materials**

97 The West African Sorghum Association Panel (WASAP) consists of  $N = 756$  genotyped  
98 accessions from the four West African countries of Senegal (118 accessions), Mali (123), Togo  
99 (156), and Niger (359) (Faye *et al.*, 2021) (Fig. 1a). The panel includes predominantly landraces  
100 along with some local breeding lines and local improved varieties. Five local breeding lines were  
101 used as checks for use in augmented design: T1 (IRAT 204/CE151-262), T2 (CE145-266), T3

102 (ISRA-621B/Faourou), T4 (CE180-33), and T5 (53-49). Two international drought-response  
103 reference lines, Tx7000 (pre-flowering drought tolerant, post-flowering drought susceptible) and  
104 BTx642 (pre-flowering drought susceptible, post-flowering drought tolerant), were used as  
105 controls (Burke *et al.*, 2013; Borrell *et al.*, 2014a).

## 106 **Field trials**

107 Field experiments were performed over four years (2014–2017) in Senegal at the Bambey  
108 Research Station, CNRA–Centre National de Recherche Agronomique (14.42°N, 16.28°W) in  
109 the Soudano-Sahelian zone (Fig. 1a). The average annual precipitation is ~600 mm, which occurs  
110 strictly in the rainy season ("hivernage") of July to October, with maximum monthly  
111 precipitation typically occurring in August (Fig. 1b). In total, ten experiments were performed in  
112 an incomplete randomized block design (augmented block design) across the four years (Table 1;  
113 Fig. S1a-f). The experimental set-up followed a column–row field layout with 30 blocks for 2014  
114 experiments or 25 blocks for 2015-2017 experiments, with 19 genotypes and the 5 local check  
115 varieties (present in each block for spatial variation analysis) within each block. Each entry was  
116 sown in a 3 m row with 0.6 m space between rows and 0.2 m space between plants (or hills)  
117 within a row. Each entry was surrounded by one row of fill material (IRAT 2014). Ten days after  
118 planting, plants were thinned to keep only one plant per hill, for a density of about 84,000 plants  
119 ha<sup>-1</sup>. Two experiments were carried out under rainfed conditions (RF) during the rainy season in  
120 2014 with one-month planting date interval: RF1 (planted in August) and RF2 (planted in  
121 September). Managed drought stress experiments were conducted in the off-season to take  
122 advantage of the complete lack of precipitation during the Sahelian dry season (Fig. 1b).

## 123 **Managed drought stress**

124 Well-watered (WW) and pre-flowering water stress (WS1) experiments were planted during the  
125 hot off-season in 2015 (March to August). Three experiments, under WW, WS1, and post-  
126 flowering water stress (WS2), were planted during the cool off-season in 2015–2016 (October  
127 2015 to March 2016; note as "2016" experiments) and 2016-2017 (October 2016 to March 2017;  
128 noted as "2017" experiments). During the rainy season of 2014, the cumulative rainfall recorded  
129 was 395 mm. The average daily temperature ranges between 22.4 and 35 °C and average relative  
130 humidity between 42 and 89%. For WW, irrigation was applied twice a week (30 mm each time)  
131 until physiological maturity. For WS1, water limitation was applied 30 DAP, to mimic a one-

132 month pre-flowering drought, and irrigation was restarted 60 DAP until physiological maturity.  
133 For the WS2, water limitation was applied when 75% of plants in a maturity group flowered and  
134 maintained until physiological maturity. Three maturity groups were defined based on accession  
135 phenology characterized during 2014 experiments for water deficit application in WS2. The  
136 fraction of transpirable soil water (FTSW) in different managed drought stress experiments was  
137 determined using a DIVINER 2000 (Sentek Pty Ltd, Adelaide, SA).

### 138 **Phenotypic measurements**

139 In each environment, phenological, physiological, and yield component traits were measured.  
140 Days to 50% flowering (DFLo) of plants in a plot (one row), above-ground dry biomass (DBM),  
141 plant height (PH), and yield components including grain weight per panicle (GrW), panicle  
142 weight (PW), grain number per plant (GrN), and thousand-grain weight (TGrW) were measured  
143 and used for association mapping studies. For each trait except for DFLo and TGrW, three plants  
144 from the middle row of each plot were used for measurements. The drought stress tolerance  
145 index (STI) (Li *et al.*, 2018a; Yuan *et al.*, 2019) for grain weight was calculated from the GrW  
146 under WW and WS1 or WS2 as follows:

$$147 \quad STI = \frac{(Y_{ww})(Y_{ws})}{Y_{m.ww}^2}$$

148 Where  $Y_{ww}$  and  $Y_{ws}$  is the grain weight of a given genotype in WW and WS environments,  
149 respectively, and  $Y_{m.ww}$  is the mean value of GrW in the WW environment. For the STI, the  
150 higher the value, the more tolerant the genotype to the stress. The drought reduction of each yield  
151 component relative to the control environment was calculated as follow:

$$152 \quad Ri(\%) = \frac{Y_{ww} - Y_{ws}}{Y_{ww}} \times 100$$

153 Where  $Ri$  is the drought response of a genotype for trait  $i$ ,  $Y_{ww}$  and  $Y_{ws}$  are the performance of the  
154 genotype in the control environment and water-stressed environment, respectively.

### 155 **Statistical analysis of phenotypes**

156 Each year-treatment combination is considered an environment. Statistical analysis was  
157 performed using the R program (R Core Team, 2016). Spatial variation within each environment  
158 was analyzed based on the check varieties in each block using the *SpATS* package (Rodríguez-  
159 Álvarez *et al.*, 2018) to obtain genotype-adjusted means. The variance components were

160 estimated by fitting the mixed linear model with random effects for all genotypes (G), water  
161 regimes (WR), years (Y), and GxY interaction effects using the *lme4* package (Bates et 2010).  
162 Broad sense heritability ( $H^2$ ) was calculated based on variance components derived from the  
163 mixed effect model.  $H^2$  was estimated for each trait across environments based on the genotypic  
164 variance and the total phenotypic variance. Phenotypic correlations among traits were calculated  
165 using the Pearson correlation coefficient of the PerformanceAnalytics package (Peterson *et al.*,  
166 2014). Tukey's Honestly Significant Difference (TukeyHSD) test in the Agricolae package  
167 (Mendiburu, 2009) was used to test the difference of genotype performance between  
168 environments or botanical types. The BLUP values of the phenotypes were calculated by  
169 combining data for a given water regime across years or across all environments. The phenotypic  
170 BLUPs and genotype-adjusted means were used for the genome-wide association analysis across  
171 environments.

## 172 **Genome-wide association studies**

173 To identify drought-yield QTLs, GWAS was performed using the general linear model (GLM)  
174 with principal component (PC) eigenvalues and mixed linear model (MLM) in the GAPIT  
175 package (Lipka *et al.*, 2012). These two GWAS models were used as complementary because the  
176 GLM may identify false-positive associations while MLM may lead to false-negative  
177 associations when controlling for false-positive significant associations. The SNP dataset was  
178 filtered for  $MAF > 0.02$ , which corresponds to  $>15$  observations of the minor allele within the  
179 panel of  $N = 756$  genotyped accessions. The first five PCs and the kinship matrix were used to  
180 account for population structure and genetic relatedness effects, respectively for the MLM. The  
181 significance level of GWAS associations were defined based on Bonferroni-corrected  $p$ -value  
182 0.05 for the GLM with PC (referred to as GLM+Q hereafter) or at least top five SNPs above  $p <$   
183  $10^{-5}$  cutoff for the MLM. The most highly-associated SNP ("lead SNP") within a 150 kb genomic  
184 region defined based on average linkage disequilibrium (LD) decay in global sorghum  
185 germplasm (Morris *et al.*, 2013) was chosen to represent the association. A list of a priori  
186 candidate genes of cloned cereal flowering times from a previous study (Faye *et al.*, 2019) was  
187 used for colocalization analysis between lead SNP and candidate genes.

## 188 **Locus-specific analyses**

189 LD heatmaps were constructed using the R package *LD heatmap 0.99-4* (Shin *et al.*, 2006).  
190 BLUP values of phenotypes across water stress environments were used for the estimation of the  
191 proportion of phenotypic variance explained (PVE) by lead SNPs from the GWAS. The PVE  
192 was estimated using linear models with fractions of ancestry inferred by ADMIXTURE  
193 (Alexander *et al.*, 2009) used as fixed covariates. Statistical enrichment analysis for  
194 colocalization between GWAS lead SNPs and all *Stg* QTLs from the sorghum QTL Atlas (Mace  
195 *et al.*, 2019) was performed based on 1000 permutation tests. Statistical significance was  
196 assessed with a two-sample *t*-test with  $\alpha = 0.05$ . Geographic distribution of the associated lead  
197 SNP alleles with DFLo or putative drought tolerance was determined using an existing set of  
198 georeferenced global sorghum landraces (Lasky *et al.*, 2015). Lead associations within *Stg1-3*  
199 QTLs were selected based on their association with drought tolerance variables, LD with other  
200 lead associations within a locus, contribution to the phenotypic variation, and availability in the  
201 GBS data for global sorghum landraces.

## 202 **Genome-wide selection scans**

203 For selection scans, we included 550 worldwide sorghum accessions including wild relative  
204 sorghum accessions with available sequencing data (Morris *et al.*, 2013). Genome-wide selection  
205 scans were performed based on 100 kb sliding windows using the vcfTools program (Danecek *et*  
206 *al.*, 2011). Decreased genome-wide nucleotide diversity ( $\pi$ ) in durra-caudatum, durra, and guinea  
207 cultivars relative to wild relatives was performed to assess domestication and diversification  
208 selections for drought responses to dry (in durra-caudatum and durra genome) versus humid (in  
209 guinea genome) regions. Statistical enrichment analysis for colocalization between  $\pi$  outlier  
210 regions and *Stg1-4* loci was performed based on 1000 permutation tests. Statistical significance  
211 of mean differences were based on two-sided two-sample *t*-tests with  $\alpha = 0.05$ .

## 212 **RESULTS**

### 213 **Phenotypic variation for drought tolerance related traits**

214 A total of 590 WASAP accessions were evaluated for phenological, physiological, and yield  
215 component traits under ten environments across four years in Senegal (Fig. 1a,b; Fig. S1). To  
216 assess the level of drought stress applied, we estimated the fraction of transpirable soil water  
217 (FTSW) in the WW, WS1, and WS2 (Fig. 1c-f). FTSW was estimated to be 0.6 in both WW and



218 stressed treatment before water deficit treatment, then dropped to ~0.2 and 0.3 in WS1 and WS2  
219 environments, respectively. To assess the effect of each water condition, we characterized the  
220 grain yield components and days to flowering of genotypes. A non-significant cross-over  
221 genotype-environment interaction ( $p < 0.08$ ) was observed between the two drought tolerance  
222 reference lines, BTx642 and Tx7000 in WS1 and WS2 (Fig. 1g). As expected, the average grain  
223 weight and number of genotypes was significantly reduced in WS1 and WS2 relative to WW  
224 treatment (Fig. S1a,b). Overall, DFLo was significantly delayed in 2015 hot off-season  
225 environments, whereas it was reduced in cool off-seasons of 2016 and 2017 relative to rainfed  
226 conditions (Fig. S1c). DFLo was delayed in WS1, whereas it was not different in WS2 relative to  
227 the WW controls. DBM was significantly reduced in all stressed environments, except in WS1 of  
228 2015 relative to RF (Fig. S1d). Average grain weight was not significantly different between RF  
229 and WS2 (Fig. S1e). The average GrN was significantly lower in WS1 than in WS2 (Fig. S1f).

### 230 **Genetic variation in drought response**

231 Broad-sense heritability ( $H^2$ ) estimates varied from moderate to high with values ranging from  
232 33% for GrN to 92% for PH in the whole WASAP (Table S1). The average grain weight was not  
233 significantly different between caudatum accessions and durra and guinea accessions within each  
234 water regime in terms of production under drought stress (Fig. 2a). The durra-caudatum  
235 intermediates had significantly higher average grain weight than caudatum (13%,  $p < 0.05$ ) and  
236 guinea (16%,  $p < 0.05$ ) accessions, but not with durra (7%,  $p < 0.1$ ) accessions. The average GrN  
237 was not significantly different between botanical types (Fig. 2b). Significant correlations were  
238 observed among yield components, including GrW, DBM, and STI for grain weight, across WS1  
239 and WS2 regimes (Fig. S2a). High positive correlation was observed between BLUP of GrW,  
240 PW, DBM, and GrN, while TGrW was negatively correlated with grain number (Fig. S2b).  
241 Significant correlations were observed between DBM in WS1 and WS2 and other yield  
242 components, GrW, GrN, DFLo, and PH across RF conditions (Fig. S2c,d). Overall, genetic  
243 differences contributed to the phenotypic variation in managed water stress conditions.

### 244 **Genome-wide association studies of flowering time**

245 To identify loci potentially underlying quantitative trait variation in West African sorghum, we  
246 carried out GWAS using 130,709 SNP markers. First, we considered DFLo under WW off-  
247 season environments of 2015, 2016, and 2017 and BLUPs across all off-season environments to

248 map known flowering time candidate genes using GLM+Q. No significant peak above the  
249 Bonferroni-corrected  $p$ -value of 0.05 was identified for DFLo of the 2015 data, but significant  
250 associations were identified for DFLo of the 2016 and 2017 data (Fig. S3). Two SNPs,  
251 S6\_55280640 and S3\_62811196, were significantly associated with DFLo in both years, and co-  
252 localized with *a priori* candidate flowering time genes *SbZfl1* (Sobic.006G201600; 9 kb away)  
253 and *SbCN12* (Sobic.003G295300; 61 kb away), respectively. In both 2016 and 2017,  
254 S6\_55280640 was the lead SNP ( $p < 10^{-10}$  in 2016;  $p < 10^{-10}$  in 2017) of the associated region on  
255 chromosome 6. A third SNP, S2\_67812515, was significantly associated with DFLo in 2017 data  
256 and colocalized with the *a priori* candidate gene *Maturity2* (Sobic.002G302700; 70 kb away).  
257 Significant associations were not identified above the Bonferroni threshold ( $p > 10^{-5}$ ) when the  
258 MLM with PCA and kinship matrix were used to account for both population structure and  
259 genetic relatedness effects (Fig. S3).

260 The same associated SNPs near *SbZfl1* and *SbCN12*, noted above, were observed for  
261 flowering time BLUPs across all off-season environments (Fig. 3a; File S1). Lead SNP  
262 S6\_55280640 was located one gene away from *SbZfl1* (Fig. 3c). The T allele of S6\_55280640,  
263 associated with shorter flowering times under RF conditions (Fig. 3d), had a wide geographic  
264 distribution and was found at high frequency in accessions of the Sahel, Ethiopia, and west India  
265 (Fig. 3e). Lead SNP S3\_62811196 was the top association near *SbCN12* (Fig. 3f). The T allele of  
266 S3\_62811196, associated with short flowering times under RF conditions (Fig. 3g), is globally-  
267 rare, found mostly in accessions from Niger and northern Nigeria (Fig. 3h).

## 268 **Genome-wide association studies for drought tolerance**

269 To generate hypotheses on the loci that underlie drought tolerance variation in sorghum, we  
270 performed GWAS for grain weight STI and the reduction of PW (RPW), DBM (RDBM), GrN  
271 (RGrN), PH (RPH), TGrW (RTGrW) in water-stressed environments. We considered water-  
272 stress scenarios separately (WW vs. WS1, WW vs. WS2) and together (WW vs. WS1 and WS2).  
273 In total, 222 and 214 associations were identified by the GLM+Q and MLM, respectively for  
274 drought response variables and STI in all drought stress environments (File S2; Fig. S4). Among  
275 the associations, 134 were commonly identified by both GWAS methods.

276 To determine QTLs that have positive pleiotropic effect on pre- and post-flowering  
277 drought tolerance among the associations above, we looked for common associations across  
278 different water-stressed environments. We defined a pleiotropic QTL as one lead SNP or locus

279 being mapped in both pre- and post-flowering drought scenarios, or associated with several  
280 drought response variables. Among the associations, 16 putative pleiotropic associations for  
281 drought responses were observed across water stress environments (Table S2). For example, the  
282 SNP S4\_67777846 was associated with STI under WS1 of 2016 and 2017 and WS2 of 2017  
283 using both GLM+Q and MLM. SNPs S3\_13763609 and S1\_74186408 were associated with  
284 RPW in WS1 and WS2 of 2017 using both GLM+Q and MLM. The identified pleiotropic lead  
285 SNPs showed significant allelic effect and significantly ( $p < 10^{-8}$ ) explained 11–25% of STI for  
286 grain weight across water deficit treatments (Table S2). Of the 16 putative pleiotropic  
287 associations, 6 associations (S4\_67777846, S2\_18195896, S9\_57781496, S10\_1402513,  
288 S6\_55048997) overlapped with associations identified for the STI BLUPs across water-stressed  
289 environments (Fig. 4; File S3).

### 290 **Drought response associations colocalizing with stay-green loci**

291 To test the hypothesis that *Stg* loci identified from Ethiopia, we characterized the colocalization  
292 of GWAS peak SNPs with previously defined *Stg* QTL intervals as summarized in the Sorghum  
293 QTL Atlas. The interval of *Stg3* (*Stg3a* and *Stg3b*) was defined based on the introgressed region  
294 by the ICRISAT breeding program (Vadez *et al.*, 2013). Of the total lead SNPs associated with  
295 STI for grain weight and drought response variables, 78 overlapped with 54 QTLs of the  
296 published *Stg* QTLs (File S4, Fig.4a,b), which represents a significant enrichment ( $p < 10^{-16}$ ).  
297 Thirty lead SNPs colocalized with known *Stg1–4* loci (Table S3). The lead SNPs colocalizing  
298 with each locus could explain up to 16% ( $p < 10^{-10}$ , *Stg1*), 20% ( $p < 10^{-13}$ , *Stg2*), 19% ( $p < 10^{-13}$ ,  
299 *Stg3a*), 27% ( $p < 10^{-16}$ , *Stg3b*) and 21% ( $p < 10^{-15}$ , *Stg4*) of the phenotypic variation across WS1  
300 and WS2 over years based on STI BLUPs. At *Stg2*, SNP S3\_56094063 was the top association  
301 ( $p$ -GLM  $< 10^{-19}$ ,  $p$ -MLM  $< 10^{-13}$ ) for STI in WS2 and WS1. At *Stg3b*, S2\_62095163 was the top  
302 association ( $p$ -GLM  $< 10^{-18}$ ,  $p$ -MLM  $< 10^{-13}$ ) with high effect for STI in WS2. The remaining lead  
303 SNP associations did not colocalize with *Stg* loci.

### 304 **Putative pleiotropic drought response associations colocalizing with stay-green loci**

305 At each of the *Stg1–4* loci there were several associations observed across two or more drought  
306 scenarios or drought response variables (Table S3). The *Stg3a* and *Stg3b* (which are next to each  
307 other) region covered associations for STI in WS1 of 2015 and 2016, STI in WS2 of 2016 and  
308 2017, RPW in WS1 of 2017, and RDBM in WS1 of 2016. There was a strong LD among the

309 lead SNPs within *Stg3b* but no LD among lead SNPs within *Stg3a* (Fig. 4c). The SNP  
310 S2\_62095163 was in strong LD with other lead SNPs in *Stg3b* but not in LD with lead SNPs in  
311 *Stg3a*. *Stg2* colocalized with putative pleiotropic associations for STI in WS1 of 2015 and 2017,  
312 WS2 of 2017, RGrN in WS1 of 2017, and RDBM in WS1 of 2016. The *Stg1* locus covered  
313 associations for RPW in WS1 and WS2 of 2017 and associations for STI in WS1 of 2017. At  
314 both *Stg1* and *Stg2* there was strong LD among several lead SNPs (Fig. 4d). At the *Stg4* locus  
315 there were associations for RPW in WS1 of 2017 and for STI in WS1 of 2015 and in WS2 of  
316 2017, and moderate LD among lead SNPs (Fig. S4f).

### 317 **Evolutionary signals around drought tolerance loci**

318 To investigate the possibility of positive selection for drought tolerance at *Stg* loci, we conducted  
319 a genome scan of pairwise nucleotide diversity ( $\pi$ ) ratios for West African sorghums relative to  
320 wild relatives (i.e. outliers with high  $\pi_{\text{sorghum}}/\pi_{\text{wild}}$  ratio), considering 95th and 99th percentile  
321 outliers (Fig. 4e,f; Fig. S5). Twelve of the lead SNPs associated with RPW and grain weight STI  
322 overlapped with  $\pi$  ratio outliers in durra-caudatums and durras, but not in guineas (Table 2).  
323 Colocalizations of  $\pi$  ratio outliers with *Stg1-4* loci were significantly enriched ( $p < 10^{-16}$ ). In  
324 durra-caudatums and durras, but not in guineas, some 99th percentile  $\pi$  ratio outliers were  
325 localized within *Stg1* (Fig. 4e,f; Fig. S5). We characterized the geographic distribution of two  
326 selected lead associations within each *Stg* locus to determine whether the *Stg* alleles are rare and  
327 only involved in local adaptation or are broadly involved in adaptation across sorghum landraces,  
328 beyond known sources in Ethiopia sorghums (Fig. 5a,b). The rare alleles associated with  
329 increased STI at a few selected lead SNPs within *Stg1-3* were broadly geographically distributed  
330 in sorghum landraces (Fig. 5c-h). (*Stg4* was excluded due to its large interval). However, the  
331 increased STI-associated allele at lead SNPs that overlapped with strong selection outliers were  
332 found mostly in WA sorghums (Fig. 5h), except for S3\_66366589 (Fig. 5g).

## 333 **DISCUSSION**

### 334 **How well do managed stress trials reveal the genetics of drought tolerance in sorghum?**

335 In this study we sought to better understand genetics of drought adaptation in sorghum, a crop  
336 that is well known for drought tolerance, but whose mechanisms of drought adaptation are not  
337 yet understood (Choudhary *et al.*, 2020). We characterized a diverse panel of West African  
338 sorghum germplasm in common-garden managed drought stress field trials with the aim of

339 balancing experimental repeatability (via the use of irrigation in off-season) with biological and  
340 breeding relevance (via the use of a field environment) (Cooper *et al.*, 2014). The usefulness of  
341 managed stress experiments to understand crop evolution and improve crop resilience depends  
342 on several criteria we consider in turn:

343 *(i) Was the intended stress applied?* Two lines of evidence support the contention that the  
344 intended drought stress was successfully imposed via irrigation management in the off-season.  
345 First, the measured soil moisture was consistently high in well-watered control treatment (FTSW  
346  $\approx 0.6$ ), but dropped to  $\sim 0.2$  at the intended times in pre- or post-flowering drought stress  
347 treatments (Fig. 1f). The FTSW values achieved in WS1 and WS2 were similar to the critical  
348 values ( $\sim 0.2$ – $0.5$ ) for decreases in transpiration and leaf expansion in diverse sorghum lines  
349 (Choudhary *et al.*, 2020), suggesting that a physiologically-relevant stress was experienced by  
350 the plants. Second, we observed a substantial (but not complete) reduction of yield components  
351 ( $\sim 50\%$ ; Fig. 2) under managed drought stress (WS1 and WS2 relative to WW), suggesting the  
352 stress was also agronomically relevant (Blum, 2010).

353 *(ii) Was the stress comparable to previous stress experiments?* To be able to address this  
354 question, we included two international drought tolerance check lines, which are the canonical  
355 post-flowering (BTx642) and pre-flowering (Tx700) drought tolerant genotypes based on many  
356 studies in the U.S. and Australia (Tuinstra *et al.*, 1996; Burke *et al.*, 2013; Borrell *et al.*, 2014b).  
357 Consistent with the idea that our managed drought stress was comparable to natural and managed  
358 drought stress in the U.S. and Australia, a strong cross-over genotype-environment interaction  
359 for grain yield of Tx7000 vs. BTx642 under pre- vs. post-flowering drought in the expected  
360 direction (Fig. 1g).

361 *(iii) Was the timing and severity of stress comparable to that in the TPE?* Among the  
362 three criteria, this is the most difficult to assess. A formal envirotyping study, which quantifies  
363 the frequency of particular water deficits relative to crop phenology, would be necessary to  
364 address this question (Chenu *et al.*, 2011; Cooper *et al.*, 2014). One particular concern for off-  
365 season managed stress would be that differences in photoperiod regime relative to the TPE (i.e.  
366 the rainy season) could change in growth or developmental dynamics in a way that alters the  
367 drought response (Blum, 2010; Gano *et al.*, 2021). However, the overall similarity of grain yield  
368 components in the rainy season (RF) and off-season experiments (Fig. S1a,e; Fig. S2c,d) suggest  
369 that the managed drought stress is broadly comparable to drought in the TPE. Ultimately, to

370 rigorously test hypotheses on the similarity of off-season managed drought to the drought in the  
371 TPE, a comparison of phenotypes under managed stress to multi-environment field trials under  
372 natural drought stress will be necessary (Cooper *et al.*, 1995).

373 **Evidence for a role of *SbZfl1* and *SbCN12* in flowering time variation and for *SbCN12* in**  
374 **drought adaptation**

375 Flowering time is a critical component of geographic adaptation (Lasky *et al.*, 2015; Castelletti *et*  
376 *al.*, 2020) and a potential contributor to drought adaptation via early-flowering drought escape  
377 (Blum, 2010). Among the six canonical sorghum photoperiodic flowering genes (*Maturity1*–  
378 *Maturity6*) characterized in U.S. germplasm, (Murphy *et al.*, 2011, 2014; Yang *et al.*, 2014;  
379 Casto *et al.*, 2019) we identified colocalization of associations only at *Ma2* (Fig. 3a). Instead, the  
380 top QTL mapped two *a priori* flowering time candidate loci, *SbZfl1* (chr6: 55.289–55.293 Mb)  
381 and *SbCN12* (chr3: 62.747–62.749 Mb) that are not known to underlie genetic variation in U.S.  
382 germplasm (Fig. 3; Fig. S3).

383 *SbZfl1* is the ortholog of maize *ZFL1/2* and rice *RLF*, which induce early flowering by  
384 activating vegetative-to-reproductive transition (Bomblies & Doebley, 2006; Rao *et al.*, 2008).  
385 While *SbZfl1* variation has not been previously identified via linkage mapping (Mace *et al.*,  
386 2019), *SbZfl1* was identified as a top candidate in a recent GWAS of photoperiodic flowering  
387 rating in a Senegal regional panel (Faye *et al.*, 2019). The MAF of the *SbZfl1* QTL was high  
388 (>0.4) in both WASAP and global georeferenced landraces (Fig. 3e), suggesting a common,  
389 moderate-effect variant exists at *SbZfl1*. Sorghum is a short day species, so under short days (e.g.  
390 the cool off-season in West Africa; Fig. 1b) it is expected to flower early, regardless of  
391 photoperiodism. Given *SbZfl1* was the top flowering time association under short days, *SbZfl1*  
392 may be a regulator of basic vegetative phase (BVP), the thermal time component of flowering  
393 regulation that acts independently of photoperiodic flowering regulation (Guitton *et al.*, 2018).  
394 This hypothesis could explain the lack of a flowering time QTL at *SbZfl1* in a previous GWAS  
395 under long days (rainy season) in the WASAP (Faye *et al.*, 2021)—subtle BVP variation at  
396 *SbZfl1* could have been masked by large-effect photoperiodic variants at *Ma6*, *SbCN8*, or other  
397 loci. However, this hypothesis would not explain the photoperiod flowering association at *SbZfl1*  
398 previously observed in Senegalese germplasm (Faye *et al.*, 2019). Given inherent limitations of  
399 association studies (Korte & Farlow, 2013) and the complexity of photothermal flowering (Li *et*  
400 *al.*, 2018b), linkage mapping and ecophysiological modeling will be needed to test these

401 hypotheses on the role of *SbZf11* in flowering time adaptation (Guitton *et al.*, 2018; Li *et al.*,  
402 2018b).

403 *SbCN12* (also known as *SbFT8*) is a co-ortholog of the canonical florigen Arabidopsis *FT*  
404 gene and ortholog of maize *ZCN12* (Yang *et al.*, 2014; Castelletti *et al.*, 2020), which was  
405 identified as a likely sorghum florigen based on conserved sequence and expression dynamics  
406 (Yang *et al.*, 2014; Wolabu *et al.*, 2016). The current GWAS findings, along with previous  
407 finding that *SbCN12* explained up to 12% of variation in global nested association mapping  
408 population (Bouchet *et al.*, 2017; Hu *et al.*, 2019), provide strong support for the hypothesis that  
409 functional allelic variation exists at *SbCN12*. Given the early-flowering associated allele near  
410 *SbCN12* is globally rare (Fig. 3h), it may be a useful new allele for sorghum breeding programs  
411 targeting earlier flowering for stress escape. Molecular cloning of causative variants at *SbCN12*  
412 and *SbZf11* could shed light on their role in flowering time evolution (Bomblies & Doebley,  
413 2006; Castelletti *et al.*, 2020) and facilitate development of molecular marker to recover locally-  
414 adaptive flowering time.

415 The evidence for a role of these flowering time genes in drought adaptation (e.g. via  
416 drought escape) is mixed. On one hand, *SbCN12* colocalized with a drought response association  
417 (RPW for WS1 vs. WW; S3\_62836558; 64 kb away; Table S3), so could plausibly underlie  
418 some variation for pre-flowering drought response of this yield component. Also the same SNP  
419 near *SbCN12* was in a window of reduced  $\pi$  in guinea genotypes (Table 2), suggesting selection  
420 at this locus. (Note, this is not the same SNP as the rare flowering time associated variant  
421 S3\_62811196, but a common variant 25 kb away). On the other hand, *SbZf11* did not colocalize  
422 with the drought response QTL (STI, RPW, etc.; the nearest association with STI, S6\_55048997,  
423 was at ~240 kb away) and there was no evidence of positive selection around *SbZf11* based on  
424 the  $\pi$  ratios (Fig. 4; Fig. S5). Given that causative variants at *SbCN12* and *SbZf11* are not yet  
425 known, hypotheses on the role of these genes in drought adaptation remain speculative, but could  
426 be tested using near-isogenic lines (NILs).

### 427 **Insights on the genetics of drought adaptation in sorghum**

428 The botanical types of sorghum vary strikingly in their morphology and geographic distribution,  
429 and based on a phytogeographic adaptation model (Vavilov, 2009). It has long been  
430 hypothesized that they vary in their drought adaptedness (Harlan & De Wet, 1972; Lasky *et al.*,  
431 2015; Wang *et al.*, 2020). For instance, durra sorghums, which predominate in arid regions, are

432 thought to be the most drought tolerant (Harlan & De Wet, 1972), while guinea sorghums, which  
433 predominate in humid regions are thought to be adapted to high humidity (De Wet *et al.*, 1972).  
434 However, previous studies of large sorghum diversity panels under managed drought stress have  
435 not directly tested this hypothesis, for instance, by comparison of drought response for yield  
436 among botanical types (Vadez *et al.*, 2011; Lasky *et al.*, 2015; Upadhyaya *et al.*, 2017).  
437 Surprisingly, in this study we find no evidence of overall differences in drought tolerance among  
438 botanical types based on the drought response of yield components (Fig. 2). These findings could  
439 be explained by one of two competing hypotheses. First, it is possible that the drought scenarios  
440 we applied do not correspond to the drought scenarios in the TPE, such that true differences in  
441 drought tolerance among botanical types were not reflected in the phenotypes. Alternatively, it  
442 may be that the major botanical types in West Africa all harbor substantial drought tolerance,  
443 presumably because droughts are common even in the higher precipitation portions of the  
444 sorghum range (Traore *et al.*, 2014). In either case, our findings suggest that long-held views on  
445 differential drought adaptation among botanical types in sorghum require more formal testing.

446       Theoretical considerations on water use tradeoffs (Tardieu, 2012) and the apparent lack  
447 of sorghum genotypes harboring both pre- and post-flowering drought tolerance (Burke *et al.*,  
448 2013) suggest that a tradeoff might exist between early versus late stage tolerance mechanisms.  
449 However, the moderate positive correlation of the grain yield estimates under pre- and post-  
450 flowering drought (e.g. for GrW or STI; Fig. S2a) suggest no major physiological tradeoff for  
451 tolerance to these contrasting drought scenarios, at least at this broad scale of diversity.  
452 Colocalization of MTA for drought tolerance related traits in WS1 and WS2 would provide  
453 further evidence for genetic factors that contribute pleiotropically to both pre- and post-flowering  
454 drought tolerance. Consistent with this hypothesis, sixteen distinct MTAs (Table S2) were  
455 detected for drought-related traits (mostly STI) under both the pre- and post-flowering drought  
456 treatments, including one (S3\_56094063) that colocalized with *Stg1-4* loci (Table S3).

457       Among the positive pleiotropic associations, the STI MTA at S4\_67777846 may be the  
458 most interesting candidate for further study, given that it had the highest PVE estimate (25%) in  
459 both pre- and post-flowering water stress over two years. This MTA did not colocalize with *Stg*  
460 QTLs or other *a priori* candidate genes, and there were no obvious *post hoc* candidate genes near  
461 the SNP, so we have no hypothesis on the biological basis of this association at this point. If  
462 confirmed, positive pleiotropic drought tolerance QTLs, which could contribute to yield stability



463 across drought scenarios, would be of great interest for breeding of broadly-adapted climate-  
464 resilient varieties and help elucidate mechanisms that circumvent potential tradeoffs (Tardieu,  
465 2012).

466 Another question that motivated our study was whether canonical *Stg* alleles, which were  
467 originally discovered in Ethiopia-derived materials (BTx642) (Borrell *et al.*, 2014a), are also  
468 present in West African landraces (Fig. 5a). The hypothesis that canonical *Stg* alleles have a  
469 broad role in drought adaptation across Africa is plausible since it is well established that durra  
470 sorghums diffused from Ethiopia across the Sahel to West Africa (Harlan & Stemler, 1976;  
471 Morris *et al.*, 2013). Indeed, we observe a statistically significant enrichment of drought  
472 tolerance related MTA colocalized with canonical *Stg* QTL intervals, which provides preliminary  
473 support for the shared *Stg* hypothesis (File S4; Table S3). Most notable among these are the  
474 highly significant association for grain weight STI under post-flowering drought at *Stg3*  
475 (*S2\_62095163*) and *Stg2* (*S3\_57614567*). Further, the West Africa drought tolerance associated  
476 alleles in the *Stg* intervals are found in Ethiopia, as would be expected if they were shared across  
477 Africa. While these findings are suggestive, they are not sufficient to exclude the alternate  
478 hypothesis (Fig. 5b) that West African drought tolerance loci are unrelated to Ethiopian-origin  
479 *Stg* alleles. Testing this hypothesis conclusively would require positional cloning of the West  
480 Africa drought tolerance QTL and *Stg* alleles.

481 The final hypothesis we considered was that drought tolerance alleles underlie drought  
482 adaptation *per se* and were subject to positive selection. This finding was supported by  
483 significant enrichment for colocalization of selection outliers with *Stg* QTLs and common allele  
484 frequencies of lead SNPs overlapping with selection outliers in durra-caudatums and durras  
485 relative to guineas (Fig. 4e,f; Fig. S5; Table 2). As with the other findings, the development of  
486 NILs and the validation of major effect QTL in breeding populations (Borrell *et al.*, 2014b,a)  
487 will be crucial to rigorously test the proposed role of QTL in these genomic regions for drought  
488 adaptation. Overall, our findings support the long-standing hypothesis that genetic variation for  
489 drought tolerance exists in West African sorghum, and provide preliminary evidence for a broad  
490 role of canonical *Stg* drought tolerance alleles across Africa.

## 491 **ACKNOWLEDGMENTS**

492 This study is made possible by the support of the American People provided to the Feed the  
493 Future Innovation Lab for Collaborative Research on Sorghum and Millet through the United

494 States Agency for International Development (USAID) under Cooperative Agreement No. AID-  
495 OAA-A-13-00047. The contents are the sole responsibility of the authors and do not necessarily  
496 reflect the views of USAID or the United States Government. Analyses were made possible by  
497 Beocat High-Performance Computing Cluster at Kansas State University.

498

499 **Author Contributions**

500 GPM, DF, NC, BS: design of the research; EAA, BS, CD: performance of the research;  
501 JMF, EAA, BS, GPM: data analysis, collection, or interpretation; JMF, GPM: writing the  
502 manuscript.

503 **REFERENCES**

- 504 **Alexander DH, Novembre J, Lange K. 2009.** Fast model-based estimation of ancestry in  
505 unrelated individuals. *Genome Research* **19**: 1655–1664.
- 506 **Blum A. 2010.** *Plant Breeding for Water-Limited Environments*. New York: Springer  
507 Publishing.
- 508 **Bomblies K, Doebley JF. 2006.** Pleiotropic effects of the duplicate maize  
509 FLORICAULA/LEAFY genes *zfl1* and *zfl2* on traits under selection during maize  
510 domestication. *Genetics* **172**: 519–531.
- 511 **Borrell AK, Mullet JE, George-Jaeggli B, Oosterom EJ van, Hammer GL, Klein PE,  
512 Jordan DR. 2014a.** Drought adaptation of stay-green sorghum is associated with canopy  
513 development, leaf anatomy, root growth, and water uptake. *Journal of Experimental Botany* **65**:  
514 6251–6263.
- 515 **Borrell AK, van Oosterom EJ, Mullet JE, George-Jaeggli B, Jordan DR, Klein PE,  
516 Hammer GL. 2014b.** Stay-green alleles individually enhance grain yield in sorghum under  
517 drought by modifying canopy development and water uptake patterns. *New Phytologist* **203**:  
518 817–830.
- 519 **Bouchet S, Olatoye MO, Marla SR, Perumal R, Tesso T, Yu J, Tuinstra M, Morris GP.  
520 2017.** Increased power to dissect adaptive traits in global sorghum diversity using a nested  
521 association mapping population. *Genetics* **206**: 573–585.
- 522 **Burke JJ, Chen J, Burow G, Mechref Y, Rosenow D, Payton P, Xin Z, Hayes CM. 2013.**  
523 Leaf dhurrin content is a quantitative measure of the level of pre-and post-flowering drought  
524 tolerance in sorghum. *Crop Science* **53**: 1056–1065.
- 525 **Castelletti S, Coupel-Ledru A, Granato I, Palaffre C, Cabrera-Bosquet L, Tonelli C,  
526 Nicolas SD, Tardieu F, Welcker C, Conti L. 2020.** Maize adaptation across temperate climates  
527 was obtained via expression of two florigen genes. *PLOS Genetics* **16**: e1008882.
- 528 **Casto AL, Mattison AJ, Olson SN, Thakran M, Rooney WL, Mullet JE. 2019.** Maturity2, a  
529 novel regulator of flowering time in Sorghum bicolor, increases expression of SbPRR37 and  
530 SbCO in long days delaying flowering. *PLOS ONE* **14**: e0212154.
- 531 **Chenu K, Cooper M, Hammer GL, Mathews KL, Dreccer MF, Chapman SC. 2011.**  
532 Environment characterization as an aid to wheat improvement: interpreting genotype–  
533 environment interactions by modelling water-deficit patterns in North-Eastern Australia. *Journal  
534 of Experimental Botany* **62**: 1743–1755.
- 535 **Choudhary S, Guha A, Kholova J, Pandravada A, Messina CD, Cooper M, Vadez V. 2020.**  
536 Maize, sorghum, and pearl millet have highly contrasting species strategies to adapt to water  
537 stress and climate change-like conditions. *Plant Science* **295**: 110297.
- 538 **Cooper M, Messina CD, Podlich D, Totir LR, Baumgarten A, Hausmann NJ, Wright D,  
539 Graham G. 2014.** Predicting the future of plant breeding: complementing empirical evaluation  
540 with genetic prediction. *Crop and Pasture Science* **65**: 311–336.

- 541 **Cooper M, Woodruff DR, Eisemann RL, Brennan PS, DeLacy IH. 1995.** A selection strategy  
542 to accommodate genotype-by-environment interaction for grain yield of wheat: managed-  
543 environments for selection among genotypes. *Theoretical and Applied Genetics* **90**: 492–502.
- 544 **Danecek P, Auton A, Abecasis G, Albers CA, Banks E, DePristo MA, Handsaker RE,**  
545 **Lunter G, Marth GT, Sherry ST, et al. 2011.** The variant call format and VCFtools.  
546 *Bioinformatics* **27**: 2156–2158.
- 547 **De Wet JMJ, Harlan JR, Kurmarohita B. 1972.** Origin and evolution of guinea sorghums.  
548 *East African Agricultural and Forestry Journal* **38**: 114–119.
- 549 **Faye JM, Maina F, Akata EA, Sine B, Diatta C, Mamadou A, Marla S, Bouchet S, Teme N,**  
550 **Rami J-F, et al. 2021.** A genomics resource for genetics, physiology, and breeding of West  
551 African sorghum. *The Plant Genome* n/a: e20075.
- 552 **Faye JM, Maina F, Hu Z, Fonceka D, Cisse N, Morris GP. 2019.** Genomic signatures of  
553 adaptation to Sahelian and Soudanian climates in sorghum landraces of Senegal. *Ecology and*  
554 *Evolution* **9**: 1–14.
- 555 **Gano B, Dembele JSB, Tovignan TK, Sine B, Vadez V, Diouf D, Audebert A. 2021.**  
556 Adaptation responses to early drought stress of West Africa sorghum varieties. *Agronomy* **11**:  
557 443.
- 558 **Guitton B, Théra K, Tékété ML, Pot D, Kouressy M, Témé N, Rami J-F, Vaksman M.**  
559 **2018.** Integrating genetic analysis and crop modeling: A major QTL can finely adjust  
560 photoperiod-sensitive sorghum flowering. *Field Crops Research* **221**: 7–18.
- 561 **Harlan JR, De Wet JMJ. 1972.** A simplified classification of cultivated sorghum. *Crop Science*  
562 **12**: 172–176.
- 563 **Harlan JR, Stemler A. 1976.** The Races of Sorghum in Africa. In: Harlan JR, Wet JMJD,  
564 Stemler ABL, eds. Origins of African Plant Domestication. Berlin, New York: DE GRUYTER  
565 MOUTON, 465–478.
- 566 **Harris K, Subudhi PK, Borrell A, Jordan D, Rosenow D, Nguyen H, Klein P, Klein R,**  
567 **Mullet J. 2007.** Sorghum stay-green QTL individually reduce post-flowering drought-induced  
568 leaf senescence. *Journal of Experimental Botany* **58**: 327–338.
- 569 **Hayes CM, Weers BD, Thakran M, Burow G, Xin Z, Emendack Y, Burke JJ, Rooney WL,**  
570 **Mullet JE. 2016.** Discovery of a Dhurrin QTL in Sorghum: Co-localization of Dhurrin  
571 Biosynthesis and a Novel Stay-green QTL. *Crop Science* **56**: 104–112.
- 572 **Hu Z, Olatoye MO, Marla S, Morris GP. 2019.** An integrated genotyping-by-sequencing  
573 polymorphism map for over 10,000 sorghum genotypes. *The Plant Genome* **12**: 1–15.
- 574 **Korte A, Farlow A. 2013.** The advantages and limitations of trait analysis with GWAS: a  
575 review. *Plant Methods* **9**: 29.
- 576 **Lasky JR, Upadhyaya HD, Ramu P, Deshpande S, Hash CT, Bonnette J, Juenger TE,**  
577 **Hyma K, Acharya C, Mitchell SE, et al. 2015.** Genome-environment associations in sorghum

- 578 landraces predict adaptive traits. *Science Advances* **1**: e1400218.
- 579 **Leiser WL, Rattunde HF, Weltzien E, Cisse N, Abdou M, Diallo A, Tourè AO, Magalhaes**  
580 **JV, Haussmann BI. 2014.** Two in one sweep: aluminum tolerance and grain yield in P-limited  
581 soils are associated to the same genomic region in West African Sorghum. *BMC Plant Biology*  
582 **14**: 206.
- 583 **Li D, Dossa K, Zhang Y, Wei X, Wang L, Zhang Y, Liu A, Zhou R, Zhang X. 2018a.**  
584 GWAS Uncovers Differential Genetic Bases for Drought and Salt Tolerances in Sesame at the  
585 Germination Stage. *Genes* **9**: 87.
- 586 **Li X, Guo T, Mu Q, Li X, Yu J. 2018b.** Genomic and environmental determinants and their  
587 interplay underlying phenotypic plasticity. *Proceedings of the National Academy of Sciences*  
588 **115**: 6679–6684.
- 589 **Lipka AE, Tian F, Wang Q, Peiffer J, Li M, Bradbury PJ, Gore MA, Buckler ES, Zhang Z.**  
590 **2012.** GAPIT: genome association and prediction integrated tool. *Bioinformatics* **28**: 2397–2399.
- 591 **Mace E, Innes D, Hunt C, Wang X, Tao Y, Baxter J, Hassall M, Hathorn A, Jordan D.**  
592 **2019.** The Sorghum QTL Atlas: a powerful tool for trait dissection, comparative genomics and  
593 crop improvement. *Theoretical and Applied Genetics* **132**: 751–766.
- 594 **Mace ES, Li Y, Prentis PJ, Bian L, Campbell BC, Hu W, Innes DJ, Han X, Cruickshank A,**  
595 **Dai C, et al. 2013.** Whole-genome sequencing reveals untapped genetic potential in Africa's  
596 indigenous cereal crop sorghum. *Nature Communications* **4**.
- 597 **Mauboussin J-C, Gueye J, N'Diaye M. 1977.** L'amélioration du sorgho au Sénégal. *Agronomie*  
598 *Tropicale* **32**: 303–310.
- 599 **McCormick RF, Truong SK, Sreedasyam A, Jenkins J, Shu S, Sims D, Kennedy M,**  
600 **Amirebrahimi M, Weers BD, McKinley B, et al. 2018.** The Sorghum bicolor reference  
601 genome: improved assembly, gene annotations, a transcriptome atlas, and signatures of genome  
602 organization. *The Plant Journal* **93**: 338–354.
- 603 **McCouch SR, Wright MH, Tung C-W, Maron LG, McNally KL, Fitzgerald M, Singh N,**  
604 **DeClerck G, Agosto-Perez F, Korniliev P, et al. 2016.** Open access resources for genome-wide  
605 association mapping in rice. *Nature Communications* **7**: 1–14.
- 606 **Mendiburu F. 2009.** *Agricolae*: statistical procedures for agricultural research.
- 607 **Morris GP, Ramu P, Deshpande SP, Hash CT, Shah T, Upadhyaya HD, Riera-Lizarazu O,**  
608 **Brown PJ, Acharya CB, Mitchell SE, et al. 2013.** Population genomic and genome-wide  
609 association studies of agroclimatic traits in sorghum. *Proceedings of the National Academy of*  
610 *Sciences of the United States of America* **110**: 453–458.
- 611 **Mullet J, Morishige D, McCormick R, Truong S, Hilley J, McKinley B, Anderson R, Olson**  
612 **SN, Rooney W. 2014.** Energy Sorghum--a genetic model for the design of C4 grass bioenergy  
613 crops. *Journal of Experimental Botany* **65**: 3479–3489.
- 614 **Mundia CW, Secchi S, Akamani K, Wang G. 2019.** A regional comparison of factors affecting

- 615 global sorghum production: the case of north america, asia and africa's sahel. *Sustainability* **11**:  
616 2135.
- 617 **Murphy RL, Klein RR, Morishige DT, Brady JA, Rooney WL, Miller FR, Dugas DV, Klein**  
618 **PE, Mullet JE. 2011.** Coincident light and clock regulation of pseudoresponse regulator protein  
619 37 (PRR37) controls photoperiodic flowering in sorghum. *Proceedings of the National Academy*  
620 *of Sciences* **108**: 16469–16474.
- 621 **Murphy RL, Morishige DT, Brady JA, Rooney WL, Yang S, Klein PE, Mullet JE. 2014.**  
622 **Ghd7 (Ma6) represses sorghum flowering in long days: Ghd7 alleles enhance biomass**  
623 **accumulation and grain production.** *The Plant Genome* **7**: 1–10.
- 624 **Paterson AH, Bowers JE, Bruggmann R, Dubchak I, Grimwood J, Gundlach H, Haberer**  
625 **G, Hellsten U, Mitros T, Poliakov A, et al.2009.** The Sorghum bicolor genome and the  
626 diversification of grasses. *Nature* **457**: 551–556.
- 627 **Peterson BG, Carl P, Boudt K, Bennett R, Ulrich J, Eric Zivot, Lestel M, Balkissoon K,**  
628 **Wuertz D. 2014.** Performanceanalytics: econometric tools for performance and risk analysis.  
629 version 1.4.4000 from r-forge.
- 630 **R Core Team RC. 2016.** *A language and environment for statistical computing.* R Foundation  
631 *for statistical computing, 2015; Vienna, Austria.*
- 632 **Rao NN, Prasad K, Kumar PR, Vijayraghavan U. 2008.** Distinct regulatory role for RFL, the  
633 rice LFY homolog, in determining flowering time and plant architecture. *Proceedings of the*  
634 *National Academy of Sciences* **105**: 3646–3651.
- 635 **Rodríguez-Álvarez MX, Boer MP, van Eeuwijk FA, Eilers PHC. 2018.** Correcting for spatial  
636 heterogeneity in plant breeding experiments with P-splines. *Spatial Statistics* **23**: 52–71.
- 637 **Shin J-H, Blay S, McNeney B, Graham J. 2006.** Ldheatmap: an r function for graphical  
638 display of pairwise linkage disequilibria between single nucleotide polymorphisms | shin |  
639 journal of statistical software. **16**.
- 640 **Tardieu F. 2012.** Any trait or trait-related allele can confer drought tolerance: just design the  
641 right drought scenario. *Journal of Experimental Botany* **63**: 25–31.
- 642 **Traore SB, Ali A, Tinni SH, Samake M, Garba I, Maigari I, Alhassane A, Samba A, Diao**  
643 **MB, Atta S, et al.2014.** AGRHYMET: A drought monitoring and capacity building center in the  
644 West Africa Region. *Weather and Climate Extremes* **3**: 22–30.
- 645 **Tuinstra MR, Grote EM, Goldsbrough PB, Ejeta G. 1996.** Identification of quantitative trait  
646 loci associated with pre-flowering drought tolerance in sorghum. *Crop Science* **36**: 1337–1344.
- 647 **Tuinstra MR, Grote EM, Goldsbrough PB, Ejeta G. 1997.** Genetic analysis of post-flowering  
648 drought tolerance and components of grain development in Sorghum bicolor (L.) Moench.  
649 *Molecular Breeding* **3**: 439–448.
- 650 **Upadhyaya HD, Dwivedi SL, Vetriventhan M, Krishnamurthy L, Singh SK. 2017.** Post-  
651 flowering drought tolerance using managed stress trials, adjustment to flowering, and mini core

- 652 collection in sorghum. *Crop Science* **57**: 310–321.
- 653 **Vadez V, Deshpande S, Kholova J, Ramu P, Hash CT. 2013.** Molecular Breeding for Stay-  
654 Green: Progress and Challenges in Sorghum. In: Varshney RK, Tuberosa R, eds. Translational  
655 Genomics for Crop Breeding. Chichester, UK: John Wiley & Sons Ltd, 125–141.
- 656 **Vadez V, Krishnamurthy L, Hash CT, Upadhyaya HD, Borrell AK. 2011.** Yield,  
657 transpiration efficiency, and water-use variations and their interrelationships in the sorghum  
658 reference collection. *Crop and Pasture Science* **62**: 645–655.
- 659 **Vavilov NI. 2009.** *Origin and geography of cultivated plants* (D Love, Tran.). Cambridge:  
660 Cambridge University Press.
- 661 **Wang J, Hu Z, Upadhyaya HD, Morris GP. 2020.** Genomic signatures of seed mass  
662 adaptation to global precipitation gradients in sorghum. *Heredity* **124**: 108–121.
- 663 **Wendorf F, Close AE, Schild R, Wasylkowa K, Housley RA, Harlan JR, Królik H. 1992.**  
664 Saharan exploitation of plants 8,000 years BP. *Nature* **359**: 721–724.
- 665 **Wolabu TW, Zhang F, Niu L, Kalve S, Bhatnagar-Mathur P, Muszynski MG, Tadege M.**  
666 **2016.** Three FLOWERING LOCUS T-like genes function as potential florigens and mediate  
667 photoperiod response in sorghum. *New Phytologist*: 1–14.
- 668 **Xu W, Subudhi PK, Crasta OR, Rosenow DT, Mullet JE, Nguyen HT. 2000.** Molecular  
669 mapping of QTLs conferring stay-green in grain sorghum (*Sorghum bicolor* L. Moench).  
670 *Genome* **43**: 461–469.
- 671 **Yang S, Murphy RL, Morishige DT, Klein PE, Rooney WL, Mullet JE. 2014.** Sorghum  
672 phytochrome B inhibits flowering in long days by activating expression of SbPRR37 and  
673 SbGHD7, repressors of SbEHD1, SbCN8 and SbCN12. *PLoS ONE* **9**: e105352.
- 674 **Yano K, Yamamoto E, Aya K, Takeuchi H, Lo P, Hu L, Yamasaki M, Yoshida S, Kitano**  
675 **H, Hirano K, et al. 2016.** Genome-wide association study using whole-genome sequencing  
676 rapidly identifies new genes influencing agronomic traits in rice. *Nature Genetics* **48**: 927–934.
- 677 **Yu J, Buckler ES. 2006.** Genetic association mapping and genome organization of maize.  
678 *Current Opinion in Biotechnology* **17**: 155–160.
- 679 **Yuan Y, Xing H, Zeng W, Xu J, Mao L, Wang L, Feng W, Tao J, Wang H, Zhang H, et**  
680 **al. 2019.** Genome-wide association and differential expression analysis of salt tolerance in  
681 *Gossypium hirsutum* L at the germination stage. *BMC Plant Biology* **19**: 394.
- 682 **Zhao Y, Qiang C, Wang X, Chen Y, Deng J, Jiang C, Sun X, Chen H, Li J, Piao W, et**  
683 **al. 2019.** New alleles for chlorophyll content and stay-green traits revealed by a genome-wide  
684 association study in rice (*Oryza sativa*). *Scientific Reports* **9**: 2541.
- 685

686

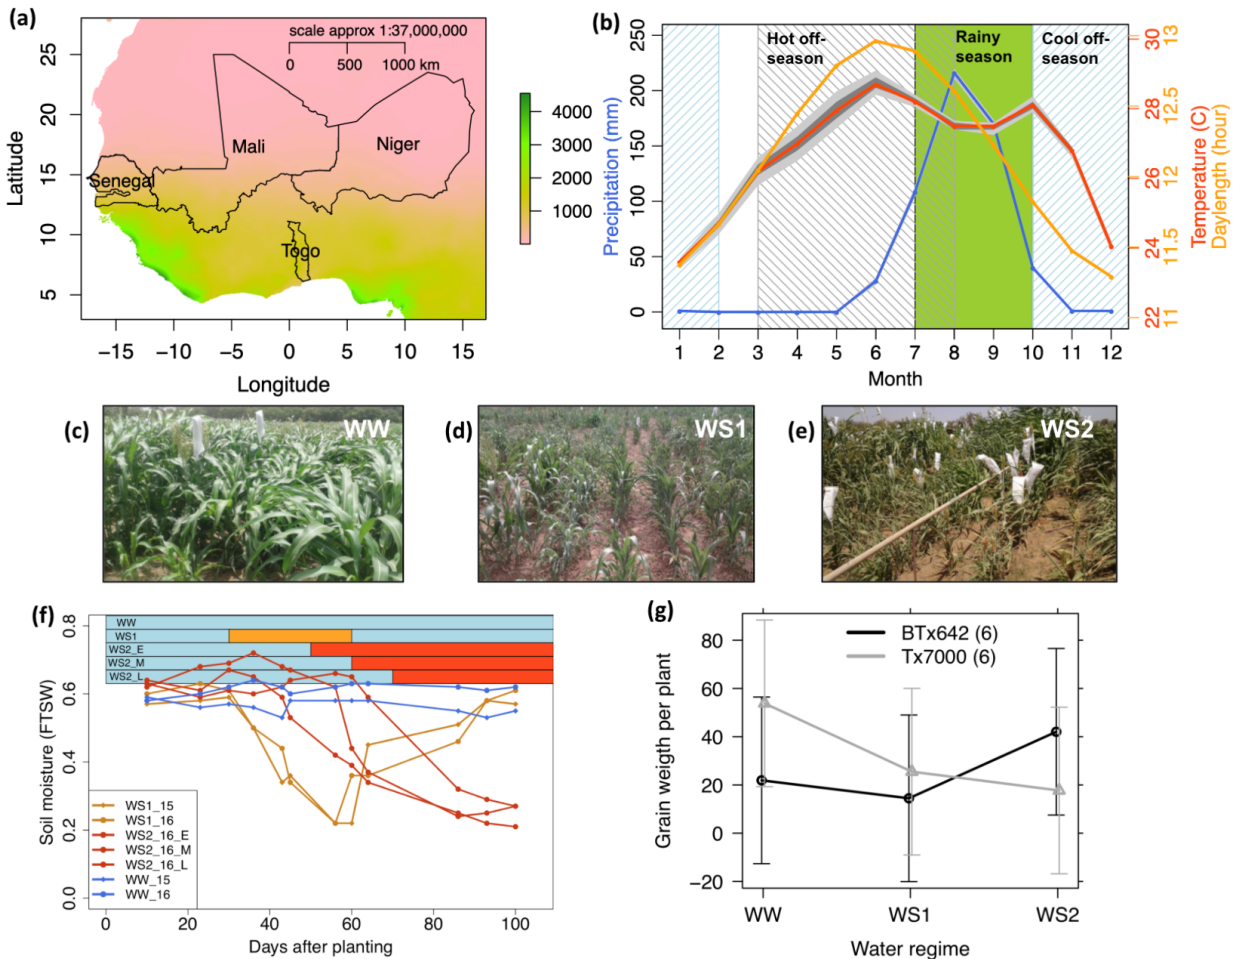

687

688

689

690

691

692

693

694

695

696

697

698

699

700

701

702

703

**Fig. 1. Experimental system to study drought stress response of diverse sorghum germplasm.** (a) The four countries of origin for sorghum accessions in the West Africa Sorghum Association Panel (WASAP) with the West African precipitation gradient noted by the color scale. (b) Average monthly precipitation, temperature, and daylength at the experimental station in Bambey, Senegal. The green block represents the rainy season ("hivernage") when farmers grow crops and when we conducted rainfed experiments. The gray-striped block indicates the hot off-season and the blue-striped block indicates the cool off-season when we conducted managed drought stress. (c-e) Photos of plants under (c) well-watered (WW), (d) pre-flowering water stress (WS1), and (e) post-flowering water stress (WS2) environments. (f) Fraction of transpirable soil water in WW (blue lines), WS1 (orange lines), and WS2 (red lines) during 2015 (line with diamond shape dots) and 2016 (line with close circle dots) off-seasons. Horizontal bars indicate the water stress application periods for WS1 (orange) and WS2 (red) relative to WW (light blue). The three red bars/lines for WS2 represent three maturity groups (E: early maturity, M: medium maturity, L: late maturity) that the panel was divided into so that post-flowering water stress could be applied consistently relative to flowering. (g) Cross genotype x environment interaction of the pre-flowering (Tx7000) and post-flowering (BTx642) drought



704 tolerance checks across WW, WS1, and WS2 environments. The error bars represent 95%  
705 confidence intervals.  
706

707

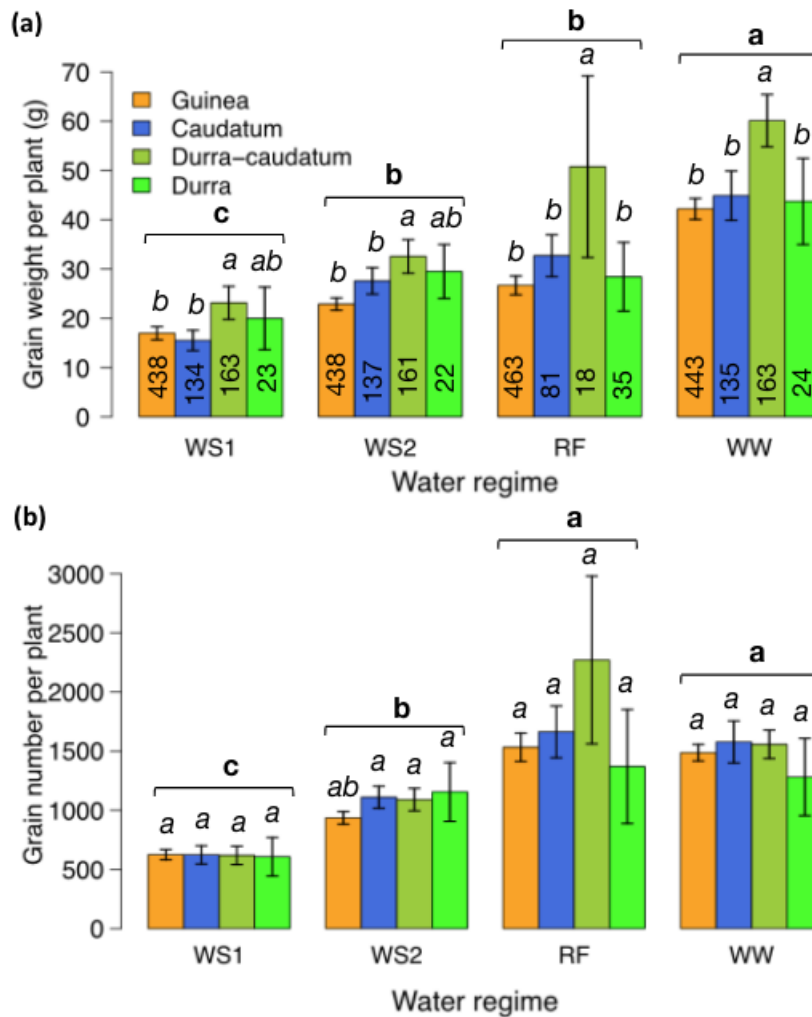

708

709 **Fig. 2. Effects of managed drought stress on grain yield components.** (a) Differences in grain  
 710 weight among botanical types within each water regime, rainfed condition (RF), well-watered  
 711 (WW), pre-flowering water stress (WS1), post-flowering water stress (WS2). Numbers within  
 712 bar plots indicate the number of genotypes per botanical type in each water regime (two  
 713 environments in each). (b) Differences in grain number among botanical types within each water  
 714 regime. The letters indicate Tukey honestly statistical difference at  $\alpha = 0.05$ , with bold letters  
 715 indicating the across water regime comparison and italics letters representing the across botanical  
 716 type comparison within the water regime.

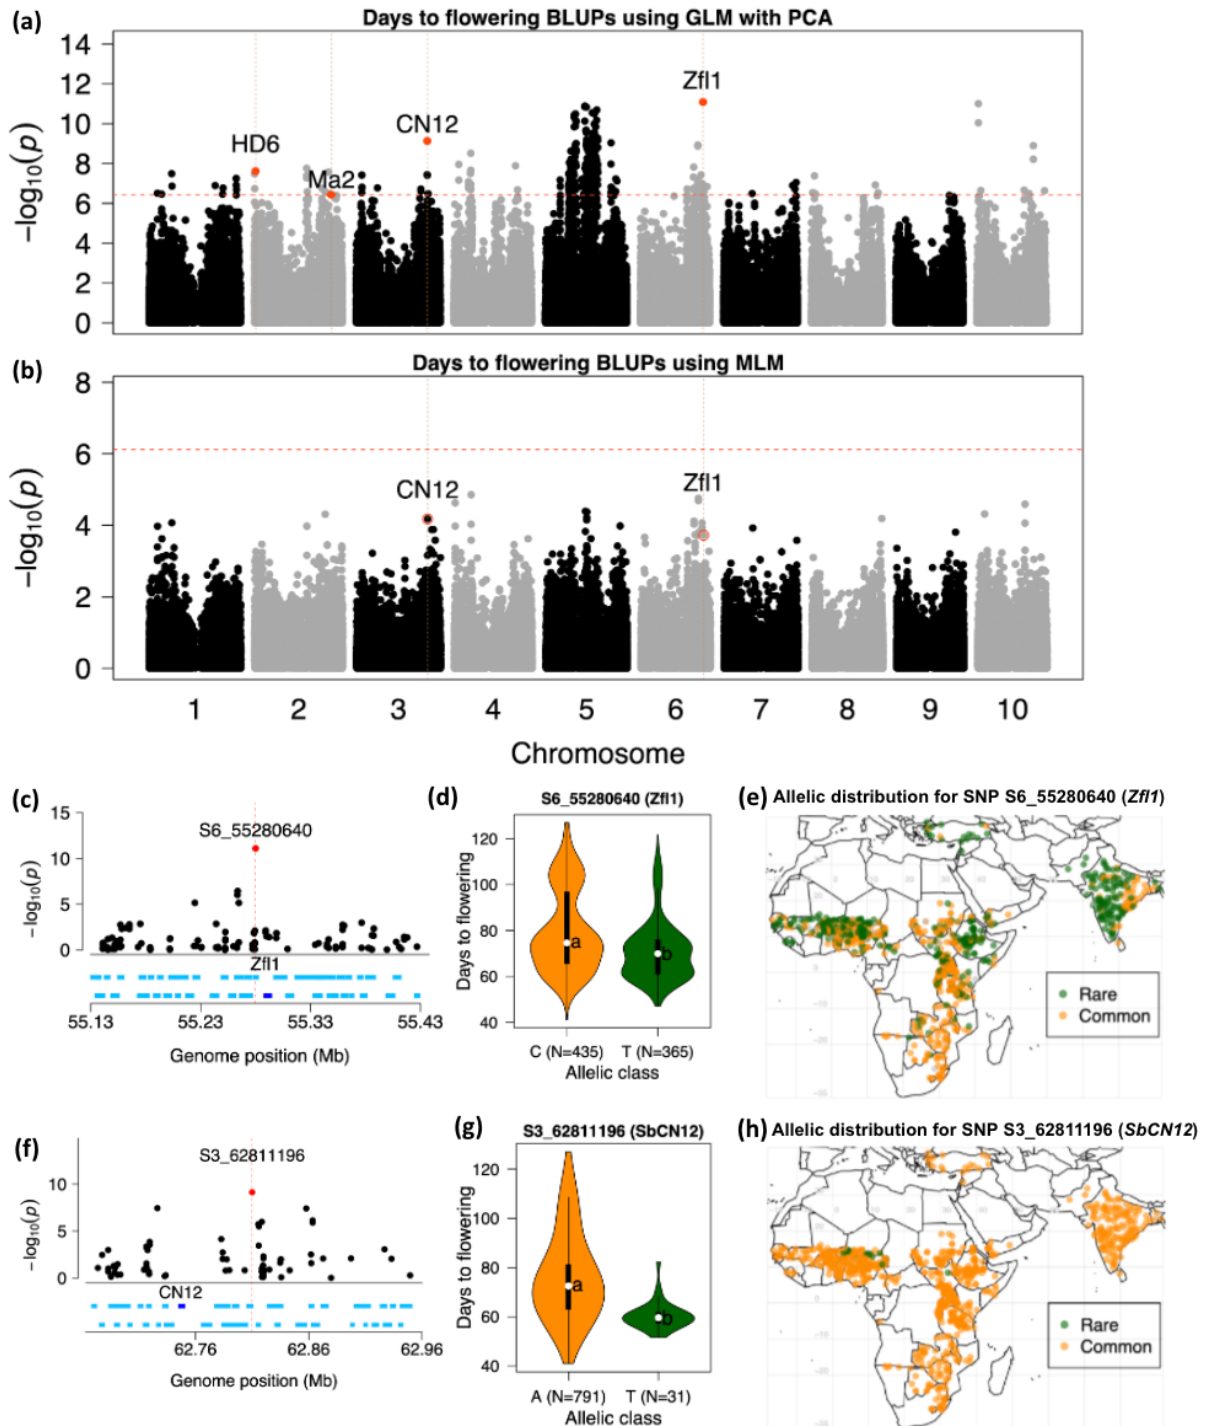

717  
 718 **Fig. 3. Genome-wide associations for flowering time.** (a, b) Manhattan plots for days to  
 719 flowering (DFLo) for best linear unbiased predictor (BLUPs) across all off-season environments  
 720 over three years using (a) general linear model with principal components (GLM+Q) and (b)  
 721 mixed-linear model (MLM). Horizontal dashed line indicates the Bonferroni correction at 0.05.  
 722 Red dots indicate peak SNPs colocalizing (based on 150 kb cutoff) with *a priori* candidate genes  
 723 for flowering time. (c) Zoomed-in Manhattan plot for the GLM+Q of a 150 kb region on

724 chromosome 6 around the lead associated SNP, S6\_55280640 that colocalizes with *a priori*  
725 candidate gene *Zfl1* (dark blue segment). (d) Days to flowering across rainfed environments by  
726 allelic classes of S6\_55280640 in the WASAP. Letters within violin pots indicate Tukey's  
727 honestly significant difference at  $\alpha = 0.05$ . (e) Geographic distribution of early (T) and late (C)  
728 flowering-associated alleles of S6\_55280640 in global sorghum landraces. (f) Zoomed-in  
729 Manhattan plot for the GLM+Q of a 150 kb region on chromosome 3 around the lead associated  
730 SNP, S3\_62811196 that colocalizes with *a priori* candidate gene *SbCN12* (dark blue segment).  
731 (g) Days to flowering across rainfed environments by allelic classes of S3\_62811196 in the  
732 WASAP. (h) Geographic distribution of the early (T) and late (A) flowering-associated alleles of  
733 S3\_62811196 in global sorghum landraces.

734

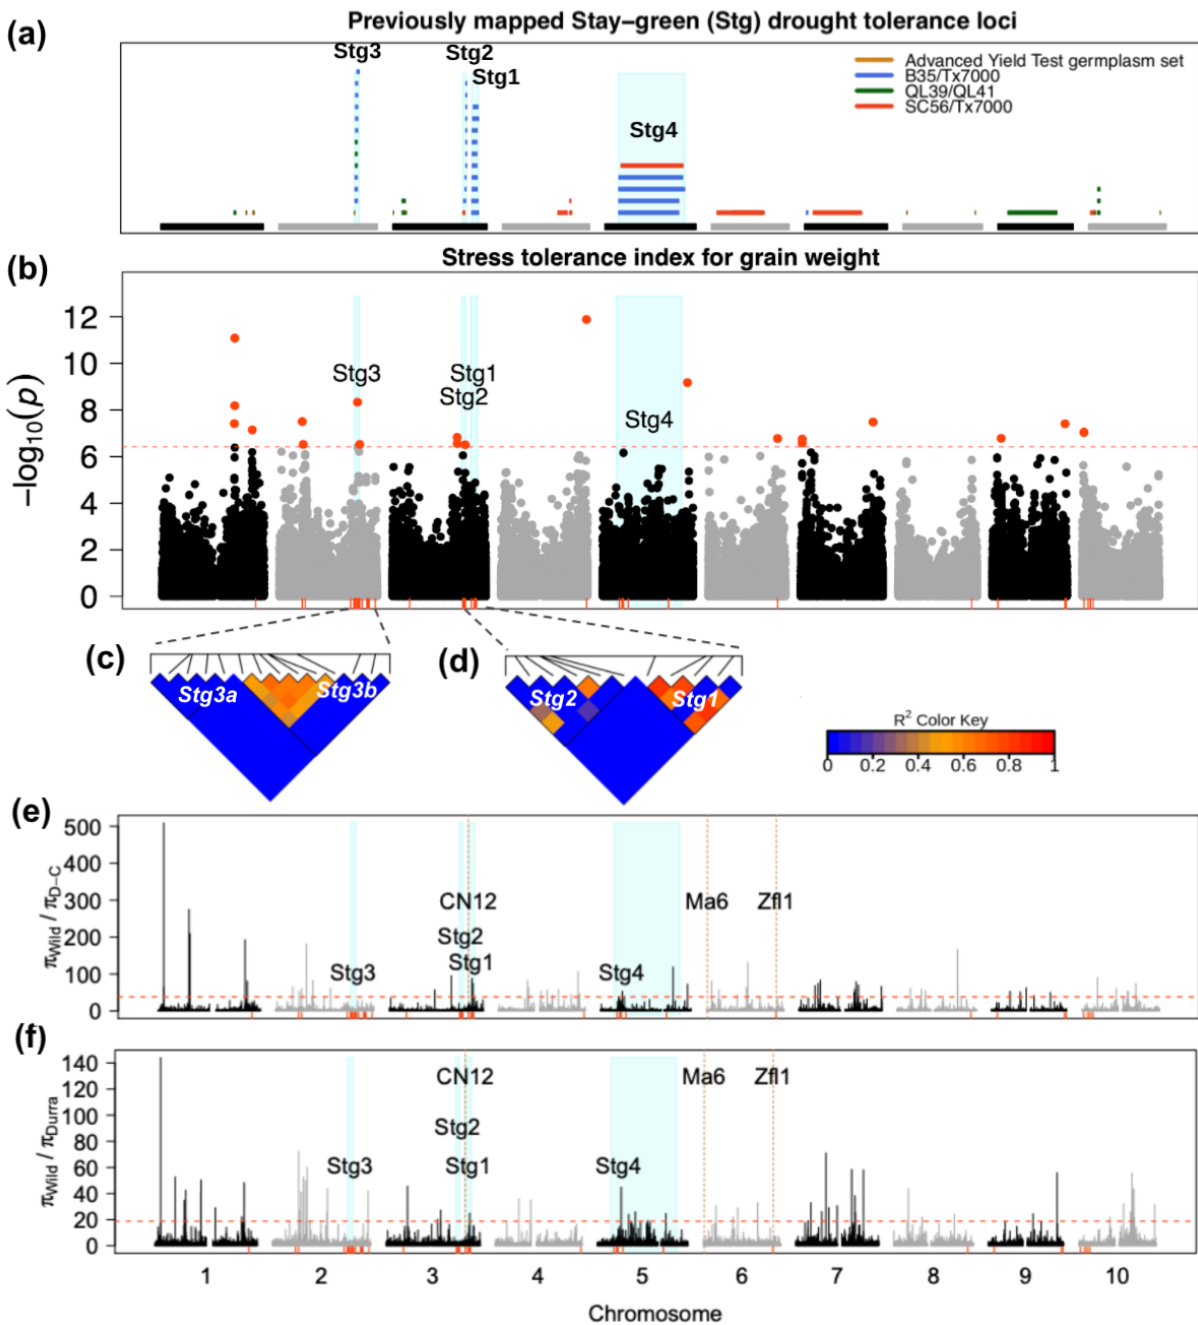

735

736

737

738

739

740

741

742

743

**Fig. 4. Genome-wide associations for drought tolerance and genome scans for adaptation.**

(a) Genomic location of the different stay-green quantitative trait loci, including *Stg1–4*, obtained from the Sorghum QTL Atlas. Light blue bars indicate the genomic position of *Stg1–4* intervals.

(b) Manhattan plots of BLUPs of stress tolerance index (STI) for grain weight across pre-flowering (WS1) and post-flowering (WS2) water-stressed treatments of 2015–2017 based on GLM+Q. The horizontal red dashed line represents the Bonferroni significance threshold at 0.05,

and red dots indicate lead SNPs above the threshold. Some lead SNPs colocalize within *Stg1*, *Stg2*, *Stg3*, and *Stg4* loci that are represented by light blue barplots. Rug-plots indicate the

744 genomic position of the putative pleiotropic lead SNPs and lead SNPs at *Stg1–4* loci,  
745 significantly associated with grain weight STI and drought response variables, reduction of PW  
746 (RPW), DBM (RDBM), GrN (RGrN), PH (RPH), TGrW (RTGrW). (c) LD heatmap for lead  
747 SNPs at *Stg3a* (left triangle) and *Stg3b* (right triangle). (d) Linkage disequilibrium (LD) heatmap  
748 for lead SNPs at *Stg2* (left triangle) and *Stg1* (right triangle). (e, f) Reduction of nucleotide  
749 diversity, based on 100 kb sliding windows, (e) in durra-caudatum (D-C) and (f) in durra  
750 landraces relative to wild sorghums. Red dashed horizontal lines indicate the 99 percentile  
751 threshold for signatures of selection outliers. Rug-plots in red indicate lead SNPs for putative  
752 pleiotropic lead SNPs and lead SNPs within *Stg1–4* loci associated with drought response  
753 variables. Light blue bars indicate the genomic position of *Stg1–4* intervals.

754

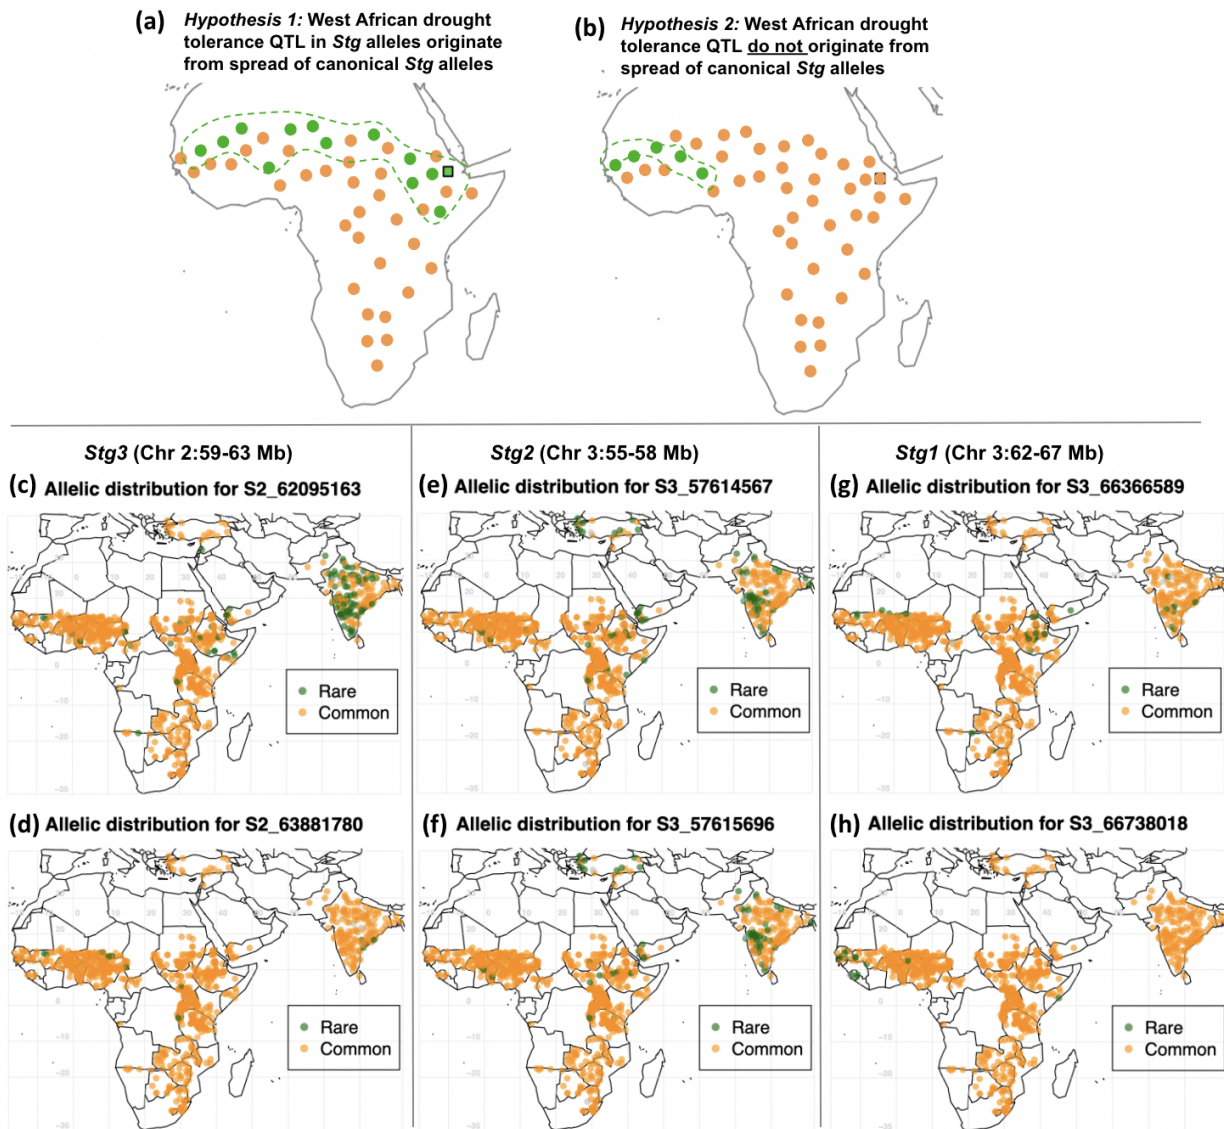

755

756 **Fig. 5. Evidence for a broad role of canonical staygreen alleles in drought adaptation.** (a, b)  
757 Competing hypotheses on the origin of West African drought tolerance MTA and relationship  
758 with the canonical *Stg* alleles (titles), and graphical predictions under each hypothesis  
759 (diagrams). Under hypothesis 1 (panel a) some West African drought tolerance MTA represented  
760 *Stg* alleles that have diffused from Eastern Africa, while under hypothesis 2 (panel b) these MTA  
761 are unrelated to *Stg* alleles. The location of the known *Stg* allele source, accession IS12555 from  
762 Ethiopia, is noted by the black square. (c-h) Observed global allelic distributions at some West  
763 African drought tolerance MTA that colocalize with *Stg1-3*. (c, d) Geographic distribution of the  
764 common allele (orange) and rare allele (green) associated with increased drought tolerance of  
765 GWAS lead SNPs, S2\_62095163 (c) and S2\_63881780 (d) in the *Stg3* locus. (e, f) Geographic  
766 distribution of the common allele (orange) and rare allele (green) associated with increased  
767 drought tolerance of GWAS lead SNPs, S3\_57614567 (e) and S3\_57615696 (f) in the *Stg2* locus.

768 (g, h) Geographic distribution of the common allele (orange) and rare allele (green) associated  
769 with increased drought tolerance of GWAS lead SNPs, S3\_66366589 (g) and S3\_66738018 (h)  
770 in the *Stg1* locus, respectively. The different GWAS lead SNPs above were selected based on  
771 their association with drought tolerance, proportion of variance explained, colocalization within  
772 *Stg1-3* loci, linkage disequilibrium with other lead SNPs within each *Stg1-3* locus, and  
773 availability in the GBS data for global sorghum landraces. Note, lead SNPs in *Stg4* locus were  
774 not included because of the large interval for this locus.  
775



776 **Table 1.** Details of field experiments

| <b>Treatment <sup>a</sup></b> | <b>Season</b>   | <b>Year <sup>b</sup></b> | <b>Period</b>    | <b>Trial code</b> |
|-------------------------------|-----------------|--------------------------|------------------|-------------------|
| Rainfed                       | Rainy season    | 2014                     | July–October     | RF1               |
| Rainfed                       | Rainy season    | 2014                     | July–October     | RF2               |
| Well-watered                  | Hot off-season  | 2015                     | March–August     | WW_15             |
| Pre-flowering                 | Hot off-season  | 2015                     | March–August     | WS1_15            |
| Well-watered                  | Cool off-season | 2016                     | October–February | WW_16             |
| Pre-flowering                 | Cool off-season | 2016                     | October–February | WS1_16            |
| Post-flowering                | Cool off-season | 2016                     | October–February | WS2_16            |
| Well-watered                  | Cool off-season | 2017                     | October–February | WW_17             |
| Pre-flowering                 | Cool off-season | 2017                     | October–February | WS1_17            |
| Post-flowering                | Cool off-season | 2017                     | October–February | WS2_17            |

777 <sup>a</sup> Pre-flowering and post-flowering denote the pre- or post-flowering water stress environments;

778 <sup>b</sup> The year where the majority of the experiment took place; RF, rainfed condition; WW, well  
779 water; WS1, pre-flowering water stress; WS2, post-flowering water stress.

780

781 **Table 2.** Pairwise-wide nucleotide diversity ( $\pi$ ) ratio outliers overlapping with some lead SNP  
 782 associations and their allele frequency in each botanical type.

| Chr | Locus        | Lead SNP    | Nucleotide diversity ratio |               |               | Common allele frequency |       |        |
|-----|--------------|-------------|----------------------------|---------------|---------------|-------------------------|-------|--------|
|     |              |             | $\pi W/\pi DC$             | $\pi W/\pi D$ | $\pi W/\pi G$ | DC                      | Durra | Guinea |
| 1   | –            | S1_74186408 | <b>18.2</b>                | 3             | –             | 0.5                     | 0.5   | 0.46   |
| 2   | –            | S2_18195896 | 2.4                        | <b>9</b>      | –             | 0.49                    | 0.5   | 0.47   |
| 2   | –            | S2_20558788 | <b>61.3</b>                | <b>72.2</b>   | <b>54.6</b>   | 0.49                    | 0.5   | 0.45   |
| 2   | <i>Stg3b</i> | S2_71386056 | 2.1                        | <b>7.8</b>    | –             | 0.5                     | 0.5   | 0.44   |
| 2   | –            | S2_76213690 | <b>13.4</b>                | 3.3           | –             | 0.45                    | 0.26  | –      |
| 3   | <i>Stg1</i>  | S3_62836558 | 2.8                        | 2.2           | <b>7.5</b>    | 0.5                     | 0.5   | 0.45   |
| 3   | <i>Stg1</i>  | S3_65137990 | <b>15.1</b>                | 1.7           | –             | 0.5                     | 0.5   | 0.46   |
| 3   | <i>Stg1</i>  | S3_65430305 | <b>88.2</b>                | <b>15.5</b>   | <b>8.4</b>    | 0.5                     | 0.5   | 0.46   |
| 3   | <i>Stg1</i>  | S3_66366589 | <b>74.6</b>                | <b>25</b>     | –             | 0.5                     | 0.46  | 0.46   |
| 5   | <i>Stg4</i>  | S5_15215761 | <b>32</b>                  | 6.8           | <b>10.1</b>   | 0.5                     | 0.48  | 0.48   |
| 5   | <i>Stg4</i>  | S5_16480120 | <b>27</b>                  | <b>13</b>     | –             | 0.45                    | 0.41  | 0.48   |
| 5   | <i>Stg4</i>  | S5_20251208 | 1                          | 1.5           | <b>8.7</b>    | 0.45                    | 0.46  | 0.5    |

783 Bold numbers are among the 95 percentile of  $\pi$  ratios.

784 Chr, chromosome; DC, durra-caudatum landraces; D, durra landraces; G, guinea landraces; W,  
 785 wild sorghums.

786

787

788 **SUPPORTING INFORMATION**

789 **Fig. S1.** Summary of phenotypic data across environments

790 **Fig. S2.** Relationship among phenotypes across environments

791 **Fig. S3.** Genome-wide associations for days to flowering (DFLo) under well-watered  
792 environments over three years

793 **Fig. S4.** Genome-wide associations for stress tolerance index (STI) for grain weight under  
794 drought stress conditions over three years

795 **Fig. S5.** Reduction of nucleotide diversity in guinea landraces relative to wild sorghums, based  
796 on 100 kb sliding windows

797 **Table S1.** Descriptive statistics, variance components, and broad-sense heritability ( $H^2$ ) of yield  
798 components across managed water stress environments

799 **Table S2.** Putative pleiotropic lead SNP associations with reduction of yield components and  
800 stress tolerance index (STI) for grain weight and across water stress environments

801 **Table S3.** Lead SNP associations within *Stg1-4* loci for reduction of yield components and  
802 stress tolerance index for grain weight in separate and across water stress environments

803

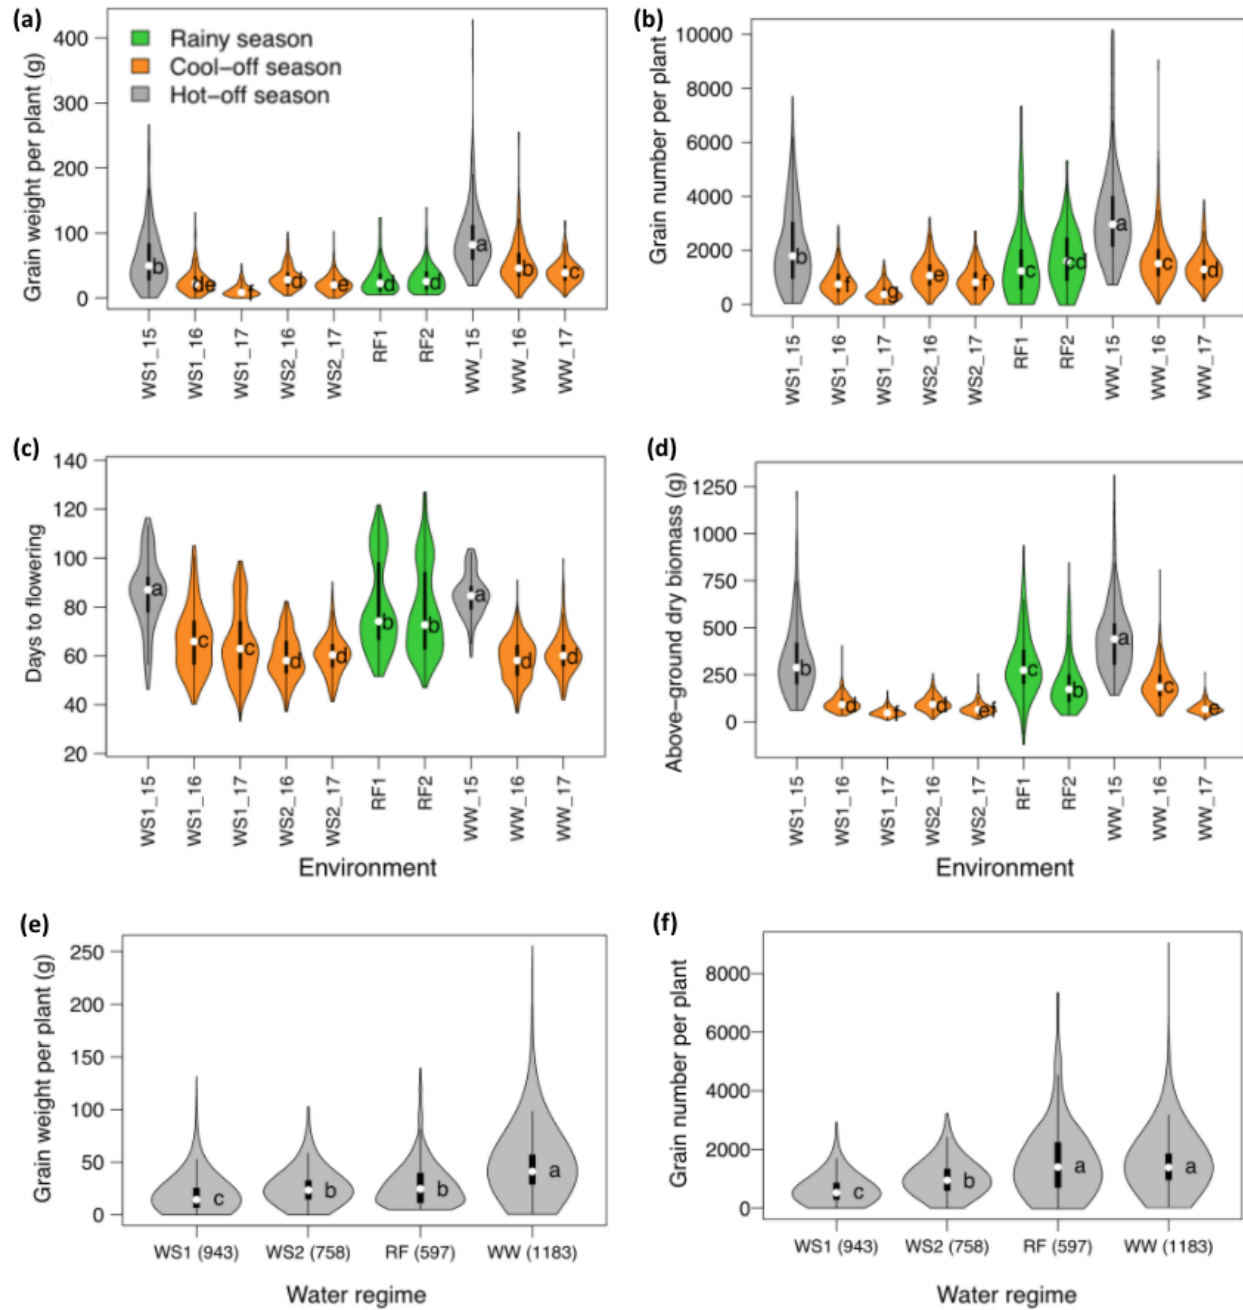

804

805 **Fig. S1. Summary of phenotypic data across environments.** (a-d) Effect of water deficit on  
 806 grain weight per plant (a), grain number per plant (b), days to flowering (c), and above-ground  
 807 dry biomass (d) of accessions in each environment across the different water regimes (WS1, pre-  
 808 flowering water stress; WS2, post-flowering water stress; RF, rainfed; WW, well-watered). The  
 809 environments under rainfed (RF1 and RF2), cool off-season, and hot off-season conditions are  
 810 colored in green, orange, and gray, respectively. (e, f) Average values for grain weight per plant  
 811 and grain number per plant (f) in each water regime, excluding the 2015 data. Letters within  
 812 violin plots indicate the TukeyHSD statistical difference at  $\alpha = 0.05$ .

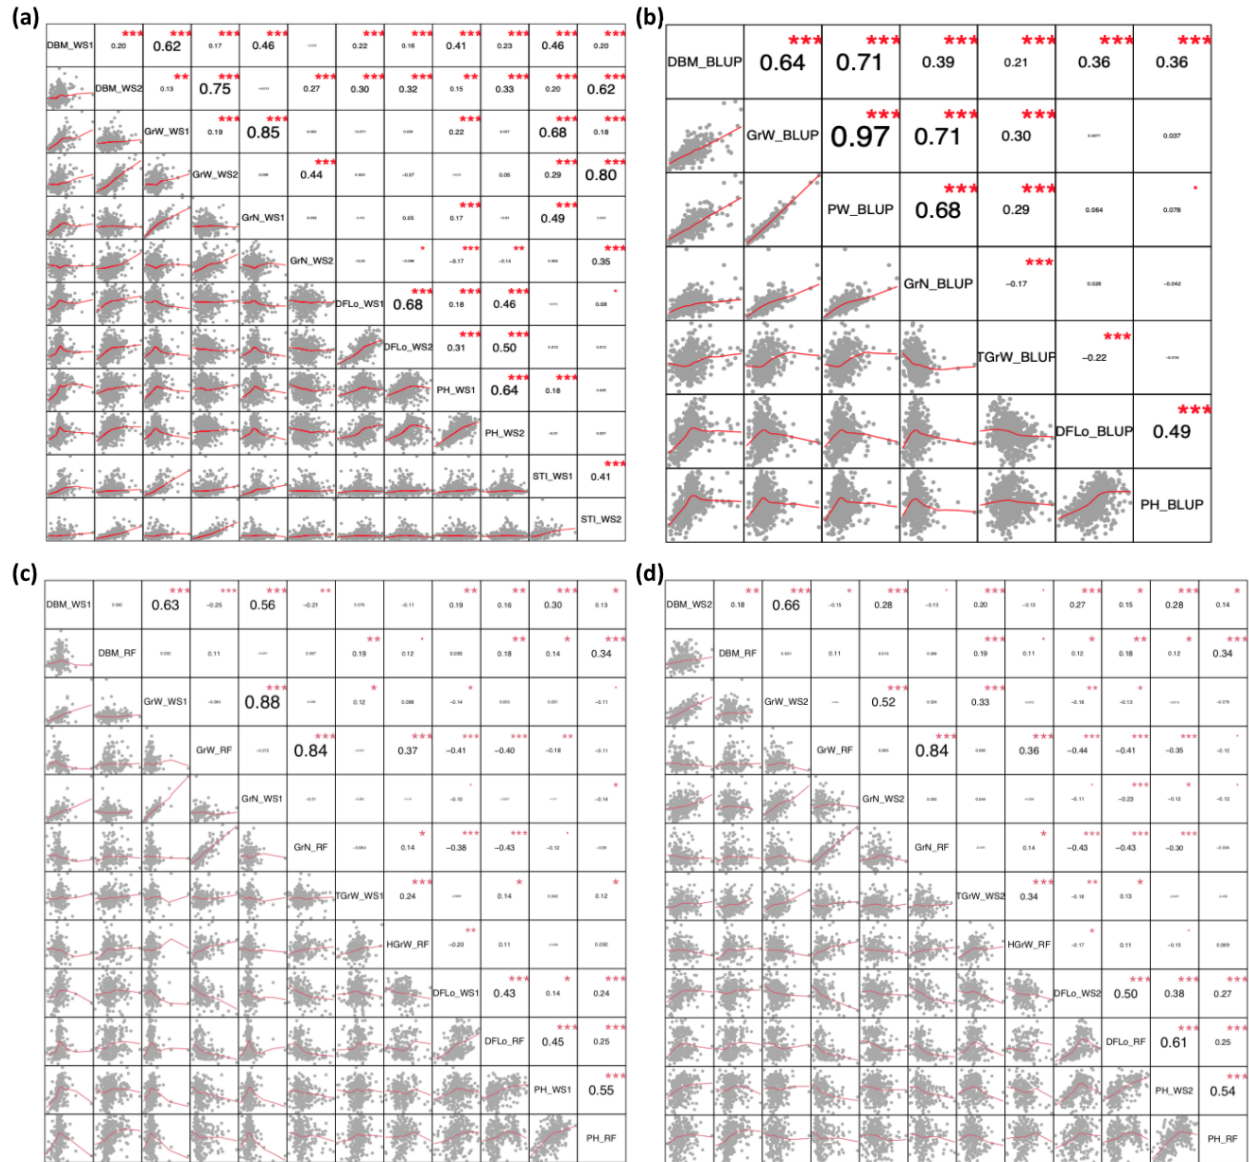

813  
 814 **Fig. S2. Relationship among phenotypes across environments.** (a) Correlations for yield  
 815 components based on BLUP values in pre-flowering (WS1) and BLUP values in post-flowering  
 816 (WS2) water stress environments. (b) Correlations for yield components based on BLUP values  
 817 across all environments. (c, d) Correlations for yield components based on BLUP values in  
 818 rainfed (RF) environments relative to WS1 (c) and WS2 (d) water stress environments. DBM,  
 819 above-ground dry biomass; GrW, grain weight per plant; PW, panicle weight per plant; GrN,  
 820 grain number per plant; TGrW, thousand-grain weight; DFLo, days to flowering; and PH, plant  
 821 height; HGrW, hundred grain weight.

822  
 823

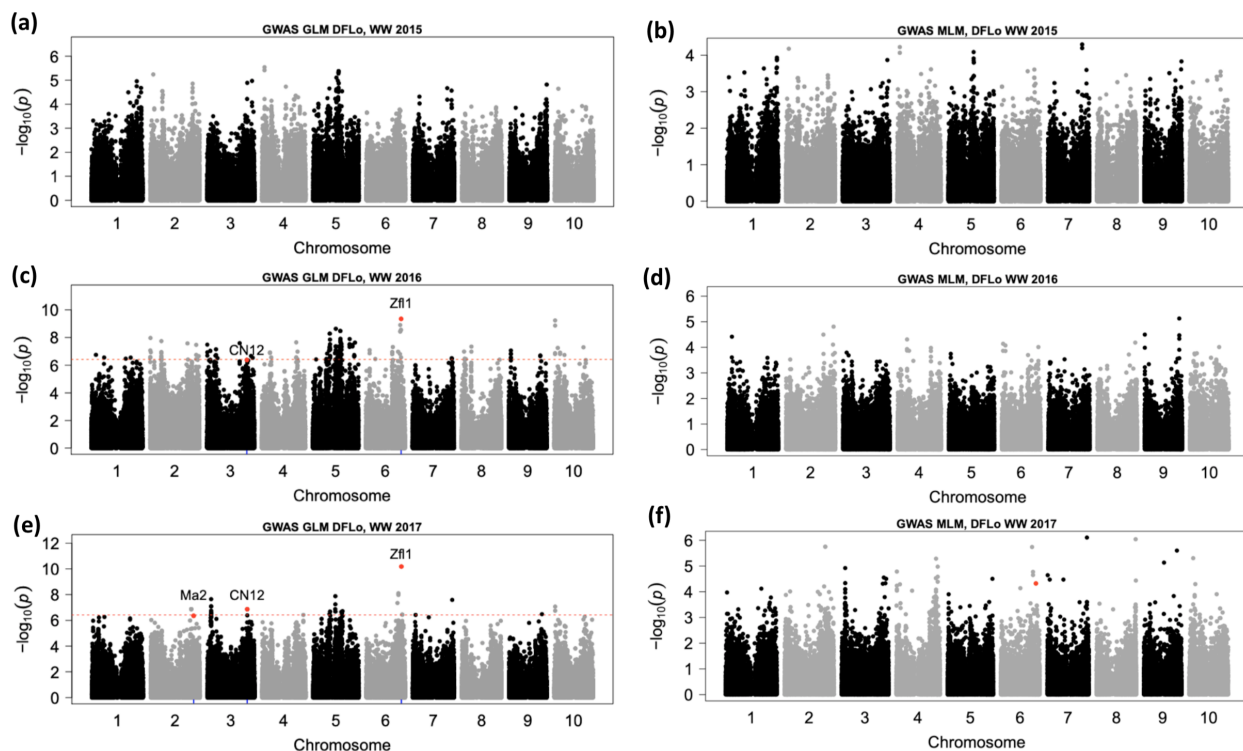

824  
825 **Fig. S3. Genome-wide associations for days to flowering (DFLo) under well-watered**  
826 **environments over three years.** (a, b) Manhattan plots for days to flowering in 2015 using (a)  
827 general linear model with principal components (GLM+Q) and (b) mixed-linear model (MLM).  
828 (c, d) Manhattan plots for days to flowering in 2016 using (c) GLM+Q and (d) MLM. (e, f)  
829 Manhattan plots for days to flowering in 2017 using (e) GLM+Q and (f) MLM. Horizontal  
830 dashed line indicates the Bonferroni correction at 0.05. Red dots indicate peak SNPs colocalizing  
831 (based on 150 kb cutoff) with flowering time candidate genes.  
832

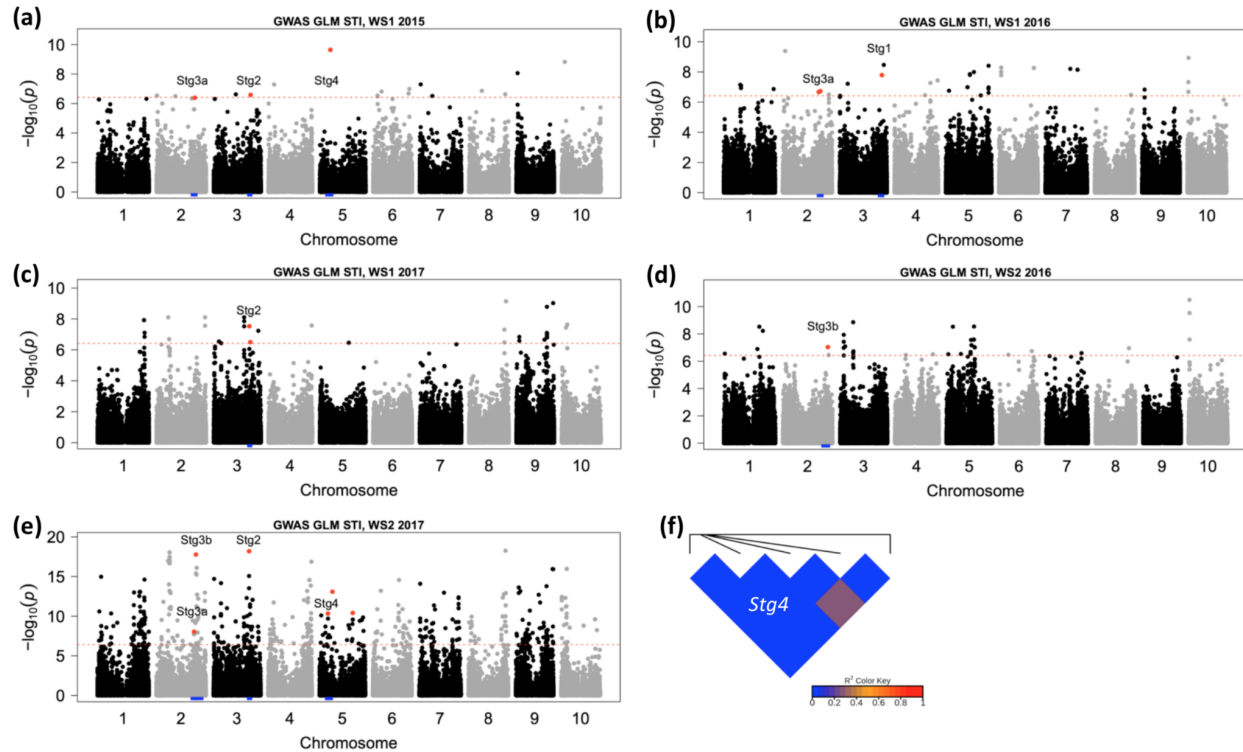

833  
834  
835  
836  
837  
838  
839  
840  
841  
842  
843

**Fig. S4. Genome-wide associations for stress tolerance index (STI) for grain weight under drought stress conditions.** (a-e) Manhattan plots of STI in pre-flowering drought (WS1) of (a) 2015, (b) 2016, and (c) 2017 and post-flowering drought (WS2) of (d) 2016 and (e) 2017, based on the general linear model with principal components covariates (GLM+Q). The horizontal red dashed line represents the Bonferroni significance threshold at 0.05. Red dots indicate lead SNPs colocalizing within *Stg1-4* loci, which are represented by blue rug plots. (f) Heatmap for lead SNPs, S5\_13190947, S5\_15215761, S5\_15916423, S5\_16480120, S5\_20251208, S5\_52255304 at *Stg4*, associated with STI and drought response for panicle weight (RPW) and represented on Table S3.

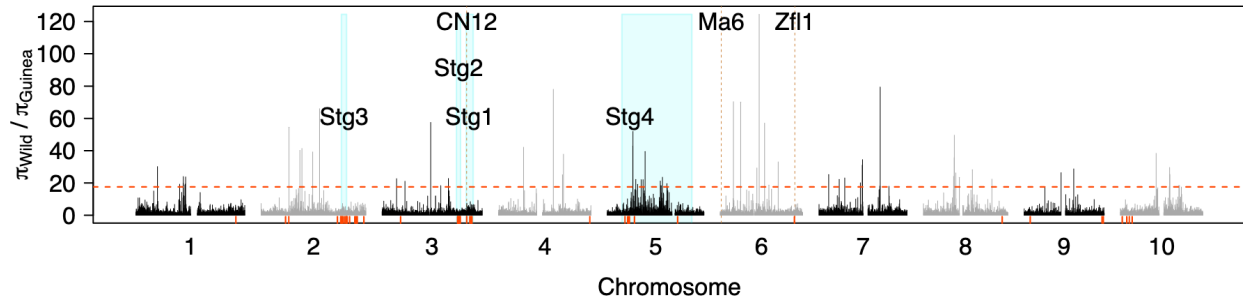

844  
845  
846  
847  
848  
849  
850

**Fig. S5. Reduction of nucleotide diversity in guinea landraces relative to wild sorghums, based on 100 kb sliding windows.** Red dashed horizontal lines indicate the 99 percentile threshold for signatures of selection outliers. Barplots in skyblue indicate the genomic position of the stay-green *Stg1–4* loci. Rug-plots in red indicate lead SNPs for putative pleiotropic QTL and lead SNPs within *Stg1–4* loci associated with drought response variables.



851 **Table S1:** Descriptive statistics, variance components, and broad-sense heritability ( $H^2$ ) of yield  
852 components across all managed water stress environments.

| Trait    | G (%)             | E (%)             | G x E (%)         | $H^2$ | Range   | Mean $\pm$ SD   | CV (%) |
|----------|-------------------|-------------------|-------------------|-------|---------|-----------------|--------|
| DBM (g)  | 3 <sup>ns</sup>   | 73 <sup>***</sup> | 8 <sup>***</sup>  | 0.54  | 6–1311  | 138 $\pm$ 144   | 105    |
| PW (g)   | 4 <sup>ns</sup>   | 57 <sup>***</sup> | 28 <sup>***</sup> | 0.46  | 0–514   | 52 $\pm$ 46     | 88     |
| GrW (g)  | 4 <sup>ns</sup>   | 51 <sup>***</sup> | 31 <sup>***</sup> | 0.44  | 0–428   | 37 $\pm$ 34     | 94     |
| GrN      | 3 <sup>ns</sup>   | 50 <sup>***</sup> | 24 <sup>***</sup> | 0.33  | 0–17780 | 1315 $\pm$ 1210 | 92     |
| TGrW (g) | 35 <sup>***</sup> | 9 <sup>***</sup>  | 28 <sup>***</sup> | 0.83  | 0–56    | 28 $\pm$ 8      | 29     |
| DFLo     | 24 <sup>***</sup> | 56 <sup>***</sup> | 9 <sup>***</sup>  | 0.91  | 33–116  | 64 $\pm$ 14     | 22     |
| PH (cm)  | 40 <sup>***</sup> | 31 <sup>***</sup> | 13 <sup>***</sup> | 0.92  | 40–356  | 182 $\pm$ 54    | 30     |

853 \*\*\* Significant at .001 probability level.

854 ns, non-significant at .05 probability level.

855 DBM, dry biomass per plant; PW, panicle weight per plant; GrW, grain weight per plant; GrN,  
856 grain number per plant; TGrW, thousand-grain weight; DFLo, days to flowering; PH, plant  
857 height; SD, standard deviation; CV, coefficient of variation; G, genotype and E, environment  
858 variances;  $H^2$ , broad-sense heritability.

859

860

861

862 **Table S2:** Putative pleiotropic lead SNP associations with reduction of yield components and  
 863 stress tolerance index (STI) for grain weight in separate and across water stress environments.

| Lead SNP <sup>a</sup> | <i>P</i> value     | MAF  | Effect | Trait | Env.   | Model    | BLUP <i>R</i> <sup>2b</sup> | BLUP <i>P</i> value <sup>c</sup> |
|-----------------------|--------------------|------|--------|-------|--------|----------|-----------------------------|----------------------------------|
| S1_74186408           | <10 <sup>-7</sup>  | 0.03 | -106   | RPW   | WS2_17 | MLM      | 0.11                        | <10 <sup>-8</sup>                |
|                       | <10 <sup>-11</sup> |      | -116   | RPW   | WS1_17 | MLM      |                             |                                  |
| S2_18195896           | <10 <sup>-9</sup>  | 0.02 | 0.32   | STI   | WS1_17 | GLM, MLM | 0.22                        | <10 <sup>-16</sup>               |
|                       | <10 <sup>-17</sup> |      | 1.07   |       | WS2_17 | GLM, MLM |                             |                                  |
| S2_20558788           | <10 <sup>-19</sup> | 0.03 | 1.50   | STI   | WS2_17 | GLM, MLM | 0.18                        | <10 <sup>-15</sup>               |
|                       | <10 <sup>-7</sup>  |      | 0.33   |       | WS1_17 | GLM, MLM |                             |                                  |
| S2_76213690           | <10 <sup>-13</sup> | 0.04 | -0.73  | STI   | WS2_17 | GLM, MLM | 0.16                        | <10 <sup>-13</sup>               |
|                       | <10 <sup>-9</sup>  |      | -0.25  |       | WS1_17 | GLM, MLM |                             |                                  |
| S3_13763609           | <10 <sup>-7</sup>  | 0.02 | -110   | RPW   | WS2_17 | MLM      | 0.12                        | <10 <sup>-9</sup>                |
|                       | <10 <sup>-11</sup> |      | -145   |       | WS1_17 | MLM      |                             |                                  |
| S3_56094063           | <10 <sup>-19</sup> | 0.02 | 1.34   | STI   | WS2_17 | GLM, MLM | 0.19                        | <10 <sup>-16</sup>               |
|                       | <10 <sup>-8</sup>  |      | 0.38   |       | WS1_17 | GLM, MLM |                             |                                  |
| S4_67777846           | <10 <sup>-17</sup> | 0.03 | -1.20  | STI   | WS2_17 | GLM, MLM | 0.25                        | <10 <sup>-6</sup>                |
|                       | <10 <sup>-8</sup>  |      | -1.19  |       | WS1_16 | GLM, MLM |                             |                                  |
|                       | <10 <sup>-8</sup>  |      | -0.35  |       | WS1_17 | GLM, MLM |                             |                                  |
| S6_55048997           | <10 <sup>-7</sup>  | 0.17 | -0.30  | STI   | WS2_16 | GLM      | 0.16                        | <10 <sup>-13</sup>               |
|                       | <10 <sup>-9</sup>  |      | -0.38  |       | WS1_16 | GLM      |                             |                                  |
| S8_58355080           | <10 <sup>-19</sup> | 0.02 | 1.33   | STI   | WS2_17 | GLM, MLM | 0.18                        | <10 <sup>-16</sup>               |
|                       | <10 <sup>-10</sup> |      | 0.42   |       | WS1_17 | GLM, MLM |                             |                                  |
| S9_4530433            | <10 <sup>-14</sup> | 0.02 | 0.99   | STI   | WS2_17 | GLM      | 0.17                        | <10 <sup>-14</sup>               |
|                       | <10 <sup>-7</sup>  |      | 0.31   |       | WS1_17 | GLM      |                             |                                  |
| S9_57781496           | <10 <sup>-16</sup> | 0.02 | -0.98  | STI   | WS2_17 | GLM, MLM | 0.20                        | <10 <sup>-16</sup>               |
|                       | <10 <sup>-10</sup> |      | -0.31  |       | WS1_17 | GLM, MLM |                             |                                  |
| S9_58763841           | <10 <sup>-16</sup> | 0.02 | 1.14   | STI   | WS2_17 | GLM, MLM | 0.18                        | <10 <sup>-15</sup>               |
|                       | <10 <sup>-7</sup>  |      | 0.31   |       | WS1_17 | GLM      |                             |                                  |
| S10_1402513           | <10 <sup>-8</sup>  | 0.14 | 0.59   | STI   | WS1_16 | GLM, MLM | 0.14                        | <10 <sup>-15</sup>               |
|                       | <10 <sup>-11</sup> |      | 0.68   | STI   | WS2_16 | GLM, MLM |                             |                                  |
| S10_4711152           | <10 <sup>-6</sup>  | 0.04 | -67    | RPW   | WS1_15 | MLM      | 0.11                        | <10 <sup>-8</sup>                |
|                       | <10 <sup>-6</sup>  |      | -69    | RGrN  | WS1_15 | MLM      |                             |                                  |
| S10_6619068           | <10 <sup>-13</sup> | 0.03 | 0.90   | STI   | WS2_17 | GLM      | 0.16                        | <10 <sup>-13</sup>               |
|                       | <10 <sup>-8</sup>  |      | 0.31   |       | WS1_17 | GLM, MLM |                             |                                  |
| S10_8716926           | <10 <sup>-7</sup>  | 0.02 | -0.36  | STI   | WS1_17 | GLM      | 0.18                        | <10 <sup>-15</sup>               |
|                       | <10 <sup>-16</sup> |      | -1.47  |       | WS2_17 | GLM, MLM |                             |                                  |

864 <sup>a</sup> Digit before and after underscore indicates chromosome number and SNP position on the  
865 genome, respectively; <sup>b</sup> proportion of phenotypic variation explained based on BLUPs across  
866 water stress environments and ADMIXTURE ancestry memberships at  $K = 8$  were used as fixed  
867 effect covariate; <sup>c</sup> significance of proportion of phenotypic variation explained; MAF, minor  
868 allele frequency; GLM, general linear model with principal components; MLM, mixed-linear  
869 model; Env, water stress environments.  
870

871 **Table S3:** Lead SNP associations within *Stg1–4* loci for reduction of yield components and  
872 stress tolerance index for grain weight in separate and across water stress environments.

| Locus        | Lead SNP <sup>a</sup> | <i>P</i> value     | MAF  | Effect | Trait | Env.              | Model    | BLUP <i>R</i> <sup>2</sup> <sup>b</sup> |
|--------------|-----------------------|--------------------|------|--------|-------|-------------------|----------|-----------------------------------------|
| <i>Stg3a</i> | S2_56682379           | <10 <sup>-7</sup>  | 0.02 | -0.6   | STI   | WS1_16            | GLM, MLM | 0.16                                    |
|              | S2_59129283           | <10 <sup>-10</sup> | 0.03 | 0.9    | STI   | WS2_17            | GLM, MLM | 0.13                                    |
|              | S2_59237127           | <10 <sup>-7</sup>  | 0.03 | 0.6    | STI   | WS1_16            | GLM, MLM | 0.13                                    |
|              | S2_60191986           | <10 <sup>-7</sup>  | 0.02 | 1.3    | STI   | WS1_15            | GLM, MLM | 0.12                                    |
|              | S2_60849014           | <10 <sup>-8</sup>  | 0.02 | -95    | RPW   | WS1_17            | MLM      | 0.12                                    |
| <i>Stg3b</i> | <b>S2_62095163</b>    | <10 <sup>-18</sup> | 0.02 | 1.5    | STI   | WS2_17            | GLM, MLM | 0.21                                    |
|              | S2_62973945           | <10 <sup>-16</sup> | 0.02 | 1.2    | STI   | WS2_17            | GLM, MLM | 0.18                                    |
|              | S2_63381610           | <10 <sup>-17</sup> | 0.02 | 1.2    | STI   | WS2_17            | GLM, MLM | 0.20                                    |
|              | <b>S2_63881780</b>    | <10 <sup>-13</sup> | 0.02 | 1.1    | STI   | WS2_17            | GLM, MLM | 0.22                                    |
|              | S2_65658140           | <10 <sup>-13</sup> | 0.02 | 1      | STI   | WS2_17            | GLM, MLM | 0.15                                    |
|              | S2_69575903           | <10 <sup>-5</sup>  | 0.17 | -38    | RPW   | WS1_17            | MLM      | 0.11                                    |
|              | S2_70503173           | <10 <sup>-8</sup>  | 0.04 | -0.6   | STI   | WS2_16            | GLM, MLM | 0.12                                    |
|              | S2_71386056           | <10 <sup>-5</sup>  | 0.04 | 12     | RDBM  | WS1_16            | MLM      | 0.12                                    |
| <i>Stg2</i>  | S3_56094063           | <10 <sup>-19</sup> | 0.02 | 1.3    | STI   | WS1_17,<br>WS2_17 | GLM, MLM | 0.19                                    |
|              | S3_56515341           | <10 <sup>-7</sup>  | 0.04 | 17     | RGrN  | WS1_17            | GLM, MLM | 0.12                                    |
|              | S3_56946323           | <10 <sup>-5</sup>  | 0.07 | 9      | RDBM  | WS1_16            | MLM      | 0.11                                    |
|              | <b>S3_57614567</b>    | <10 <sup>-12</sup> | 0.02 | 0.8    | STI   | WS2_17            | GLM      | 0.16                                    |
|              | <b>S3_57615696</b>    | <10 <sup>-7</sup>  | 0.02 | -0.3   | STI   | WS1_17            | GLM      | 0.16                                    |
|              | S3_58067325           | <10 <sup>-7</sup>  | 0.06 | -1     | STI   | WS1_15            | GLM, MLM | 0.11                                    |
| <i>Stg1</i>  | S3_62836558           | <10 <sup>-8</sup>  | 0.02 | -72    | RPW   | WS1_17            | GLM      | 0.12                                    |
|              | S3_65137990           | <10 <sup>-10</sup> | 0.02 | -73    | RPW   | WS1_17            | GLM, MLM | 0.11                                    |
|              | S3_65430305           | <10 <sup>-7</sup>  | 0.02 | 96     | RPW   | WS2_17            | MLM      | 0.11                                    |
|              | <b>S3_66366589</b>    | <10 <sup>-8</sup>  | 0.03 | -0.7   | STI   | WS1_16            | GLM, MLM | 0.15                                    |
|              | <b>S3_66738018</b>    | <10 <sup>-11</sup> | 0.03 | 72     | RPW   | WS1_17            | GLM, MLM | 0.11                                    |
| <i>Stg4</i>  | S5_13190947           | <10 <sup>-11</sup> | 0.03 | -0.7   | STI   | WS2_17            | GLM, MLM | 0.16                                    |
|              | S5_15215761           | <10 <sup>-8</sup>  | 0.03 | -43    | RPW   | WS1_17            | GLM, MLM | 0.11                                    |
|              | S5_15916423           | <10 <sup>-8</sup>  | 0.03 | -71    | RPW   | WS1_17            | GLM, MLM | 0.11                                    |
|              | S5_16480120           | <10 <sup>-10</sup> | 0.03 | -1.2   | STI   | WS1_15            | GLM, MLM | 0.16                                    |
|              | S5_20251208           | <10 <sup>-14</sup> | 0.02 | -1     | STI   | WS2_17            | GLM, MLM | 0.19                                    |
|              | S5_52255304           | <10 <sup>-13</sup> | 0.03 | -1.5   | STI   | WS2_17            | GLM, MLM | 0.14                                    |

873 <sup>a</sup> Digit before and after underscore indicates chromosome number and SNP position on the  
874 genome, respectively; <sup>b</sup> proportion of phenotypic variation explained based on BLUPs across  
875 water stress environments and ADMIXTURE ancestry memberships at *K* = 8 that were used as  
876 fixed effect covariate; MAF, minor allele frequency; GLM, general linear model; MLM, mixed-

877 linear model; Env, water stress environments. SNPs in bold are represented in the allele maps in  
878 Figure 5.
